1 **Membrane-remodeling protein ESCRT-III homologs incarnate the evolution and**  
2 **morphogenesis of multicellular magnetotactic bacteria**

3

4 Wenyan Zhang<sup>1#</sup>, Jianwei Chen<sup>2#</sup>, Jie Dai<sup>3#</sup>, Shiwei Zhu<sup>4</sup>, Hugo Le Guenno<sup>5</sup>, Artemis Kosta<sup>5</sup>,  
5 Hongmiao Pan<sup>1</sup>, Xin-Xin Qian<sup>3</sup>, Claire-Lise Santini<sup>3</sup>, Nicolas Menguy<sup>6</sup>, Xuegong Li<sup>7</sup>, Yiran  
6 Chen<sup>1</sup>, Jia Liu<sup>1</sup>, Kaixuan Cui<sup>1</sup>, Yicong Zhao<sup>1</sup>, Guilin Liu<sup>2</sup>, Eric Durand<sup>3</sup>, Wei-Jia Zhang<sup>7</sup>,  
7 Alain Roussel<sup>8</sup>, Tian Xiao<sup>1</sup> and Long-Fei Wu<sup>3\*</sup>

8

- 9 1. CAS Key Laboratory of Marine Ecology and Environmental Sciences, Institute of  
10 Oceanology, Chinese Academy of Sciences, Qingdao 266071, China  
11 2. BGI Research-Qingdao, BGI, Qingdao 266555, China  
12 3. Aix Marseille University, CNRS, LCB, IM2B, Centuri, Marseille, 13402, France  
13 4. Yale Systems Biology Institute, West Haven, CT 06516, USA  
14 5. Microscopy Core Facility, FR3479 IMM, CNRS, Aix Marseille University, Marseille,  
15 France.  
16 6. Sorbonne Université, UMR CNRS 7590, MNHN, IRD, Institut de Minéralogie, de  
17 Physique des Matériaux et de Cosmochimie, IMPMC, 75005, Paris, France  
18 7. Laboratory of Deep-Sea Microbial Cell Biology, Institute of Deep-Sea Science and  
19 Engineering, Chinese Academy of Sciences, Sanya 572000, China  
20 8. Aix Marseille University, CNRS, LISM, Marseille, 13402, France

21

22 # contribute equally.

23 \* for correspondence: wu@imm.cnrs.fr

24

25

## 26 Abstract

27 Endosomal sorting complex required transport (ESCRT) III proteins are essential for  
28 membrane remodeling and repair across all domains of life. Eukaryotic ESCRT-III and the  
29 cyanobacterial homologs PspA and Vipp1/Imm30 remodel membrane into vesicles, rings,  
30 filaments and tubular rods structures. Here our microscopy analysis showed that multicellular  
31 bacteria, referred to as magnetoglobules, possess multiple compartments including  
32 magnetosome organelles, polyphosphate granules, vesicles, rings, tubular rods, filaments and  
33 MVB-like structures. Therefore, membrane remodeling protein PspA might be required for the  
34 formation of these compartments, and contribute to the morphogenesis and evolution of  
35 multicellularity. To assess these hypotheses, we sequenced nine genomes of magnetoglobules  
36 and found a significant genome expansion compared to unicellular magnetotactic bacteria.  
37 Moreover, PspA was ubiquitous in magnetoglobules and formed a distinct clade on the tree of  
38 eubacterial and archaeal ESCRT-III. The phylogenetic feature suggested the evolution of  
39 magnetoglobules from a unicellular ancestor of deltaproteobacterium. Hetero-expression of  
40 ellipsoidal magnetoglobule *pspA2* gene alone in *Escherichia coli* resulted in intracellular  
41 membrane aggregation. GFP fusion labeling revealed polar location of PspA2 in rod-shaped  
42 unicells and regular interval location in filamentous cells. Cryo-electron tomography analysis  
43 showed filament bundle, membrane sacculus, vesicles and MVB-like structure in the cells  
44 expressing PspA2. Moreover, electron-dense area with a similar distribution as GFP-PspA2  
45 foci in filamentous cells changed the inward orientation of the septum, which might interfere  
46 with the cell division. Collectively, these results show the membrane remodeling function of  
47 magnetoglobule PspA proteins, which may contribute to morphogenesis and the evolution of  
48 multicellularity of magnetotactic bacteria.

## 49 Introduction

50 During the evolution, eukaryotic cells have developed various internal compartments to  
51 efficiently fulfill defined functions crucial for life. One of them, endosomes, is primarily  
52 intracellular sorting organelle required for the trafficking of proteins and lipids among the  
53 compartments. The endosomal sorting complex required transport (ESCRT) machinery was  
54 originally identified for its function in delivering cargo from the plasma membrane or *trans*-  
55 Golgi to the vacuole or lysosome via the generation of multivesicular body (MVB) by  
56 deforming the endosomal-limiting membrane inward<sup>1</sup>. MVB is a hallmark of eukaryotic cells  
57 and their formation depends on ESCRT machinery including ESCRT-III proteins that function  
58 in membrane remodeling, repairing and membrane abscission in cytokinesis in eukaryotic cells  
59<sup>2</sup>. Recently, phylogenetic and structural studies have shown that bacterial Vipp1/Imm30 and  
60 PspA proteins are members of the ESCRT-III membrane-remodeling superfamily, which plays  
61 pivotal role in maintaining membrane integrity and thylakoid biogenesis, and is capable of  
62 remodeling lipid bilayers *in vitro*<sup>3-6</sup>. This finding paves the way toward a better understanding  
63 of the mechanism of compartmentalization in the primitive cells of bacteria.

64 Magnetotactic bacteria (MTB) are a phylogenetically, physiologically and morphologically  
65 heterogeneous group of Gram-negative bacteria<sup>7-9</sup>. They all produce magnetosomes, which are  
66 bacterial organelles composed of single domain magnetic nanocrystals enclosed in membrane.

67 Magnetosomes confer a magnetic dipolar moment to cells and allow them aligning in and  
68 swimming along magnetic field lines. The formation of magnetosomes is a genetic-controlled  
69 and enzyme-catalyzed process. Cryo-electron tomography (CET) analysis shows that  
70 magnetosome membrane is either continuous with or derived from the cytoplasm membrane  
71 <sup>10,11</sup>. Magnetosome biogenesis starts with invagination of cytoplasmic membrane through a  
72 protein crowding process <sup>12-14</sup>. Genetic and molecular studies indicate that MamB and MamM  
73 are important for magnetosome membrane formation in *Magnetospirillum magnetotacticum*  
74 AMB-1 <sup>14,15</sup> and *Magnetospirillum gryphiswaldense* MSR-1 <sup>16-18</sup>. Besides magnetosomes,  
75 MTB cells also contain phosphate or lipid granules and ferrosomes <sup>14,19</sup>. Formation of  
76 ferrosomes depends on ferrosome-associated (Fez) proteins that are well conserved in diverse  
77 bacteria <sup>19</sup>. Whether the membrane remodeling proteins ESCRT-III are involved in formation  
78 of these MTB organelles and granules has not been analyzed.

79 MTB exhibit myriad morphologies including cocci-ovoid, rods, vibrios, spirilla and more  
80 complex multicellular forms. Spherical magnetotactic multicellular aggregates (MMAs) were  
81 first reported by Farina et al. <sup>20</sup>. Later, Rodger et al. described many-celled magnetotactic  
82 prokaryotes (MMP) with similar morphology and swimming behavior as MMAs <sup>21</sup>. Typically,  
83 15–45 bacterial cells arrange with a helical geometry in a spherical multicellular entity with an  
84 internal acellular compartment <sup>22</sup>. This morphotype of magnetotactic organisms is observed  
85 worldwide and referred to as spherical or rosette/mulberry-shaped magnetotactic multicellular  
86 prokaryote (sMMP). Genomic analysis of a spherical uncultured magnetotactic prokaryote,  
87 *Candidatus Magnetoglobus multicellularis*, revealed several proteins, including  
88 hemagglutinin-like proteins, adhesion-like proteins, glycoprotein and integrin- and fibronectin-  
89 like proteins. These proteins were proposed to be involved in multicellular morphogenesis and  
90 development of multicellular organization in this organism <sup>23</sup>. Based on the nomenclature of  
91 ‘Magnetoglobus’, the multicellular magnetotactic prokaryotes can be referred to, with a shorter  
92 name, as magnetoglobules. Genome of another spherical magnetoglobule, *Candidatus*  
93 *Magnetomorum* sp. strain HK-1, has been sequenced <sup>24</sup>. Interestingly, it possesses two  
94 paralogous copies with highest similarity to either greigite-type magnetosome genes from  
95 *Candidatus* M. *multicellularis* or magnetite-type magnetosome genes from unicellular MTB.  
96 Besides the spherical MMPs, we have identified another morphotype, the ellipsoidal or  
97 pineapple-shaped magnetoglobules (eMMPs) in the Mediterranean Sea, the China Sea and the  
98 Pacific Ocean <sup>25-29</sup>. Approximately 60 phylogenetically identical cells assemble into a one-  
99 layer ellipsoidal entity <sup>30</sup>. Both morphotypes of magnetoglobules have the center acellular  
100 compartment or the core lumens containing vesicles probably required for molecule and  
101 information exchange among the cells. Magnetoglobules reproduce without individual cell  
102 stage through periphery-to-center unilateral invaginations of constituent cell membrane with  
103 an unknown mechanism <sup>30-32</sup>. Magnetoglobules are phylogenetically, morphologically and  
104 reproductively distinct from the extensively studied multicellular cyanobacteria, actinobacteria  
105 and myxobacteria <sup>30</sup>. The origin of the magnetoglobules as well as the involvement of ESCRT-  
106 III in the formation of the compartments and multicellular morphogenesis of magnetoglobules  
107 remain unknown. Here, to better understand the evolution of magnetoglobule multicellularity,  
108 we sequenced the genomes of five spherical and four ellipsoidal magnetoglobules, and  
109 analyzed them together with the 44 unicellular MTB genomes and the two spherical

110 magnetoglobules genomes available in the Genome Taxonomy Database (GTDB). The  
111 phylogenetic tree suggests that magnetoglobules evolved from a unicellular  
112 deltaproteobacterial ancestor. Absence of *pspA* from several taxonomic groups of unicellular  
113 MTBs indicated that PspA is unlikely required for magnetosome membrane formation. All  
114 magnetoglobules possessed PspA that clustered in a detached clade. Heterologous expression  
115 of the representative *pspA* genes of ellipsoidal magnetoglobules in *E. coli* resulted in  
116 filamentous cell morphology, aggregation of membrane, and formation of vesicles, and  
117 multivesicular body-like structure. Collectively, our results show a membrane remodeling  
118 function of PspA that contribute to intracellular compartment formation and might be involved  
119 in multicellular morphogenesis of magnetoglobules.

120

## 121 Results

### 122 Magnetoglobules are rich in intracellular granules

123 Since the discovery of magnetoglobules four decades ago, despite efforts of various  
124 laboratories, the organisms have still not been cultivated. The study of magnetoglobules is  
125 mainly carried out through imaging, biophysical, taxonomic and comparative genomics  
126 analyses. Scanning transmission electron microscopy in combination with annular darkfield  
127 imaging (STEM-HAADF) offers a better depth of observation field and a better contrast of the  
128 intracellular vacuoles and elements compared to conventional transmission electron  
129 transmission (TEM) dark-field imaging. It is a highly suitable method for imaging the thick  
130 magnetoglobules. STEM-HAADF inspection clearly showed magnetosome chains and  
131 vacuolar granules in magnetoglobules (Figure 1, A). Elemental map of these intracellular  
132 components was performed with energy-dispersive X-ray spectroscopy acquisition in parallel  
133 with STEM imaging (STEM-XEDS). Granules containing oxygen, magnesium, potassium,  
134 calcium and phosphor were scattered throughout the magnetoglobules (Figure 1, B to I). They  
135 might be polyphosphate granules with incorporation of Mg, K, Ca cations as observed in  
136 different ectomycorrhizal fungi<sup>33</sup>.



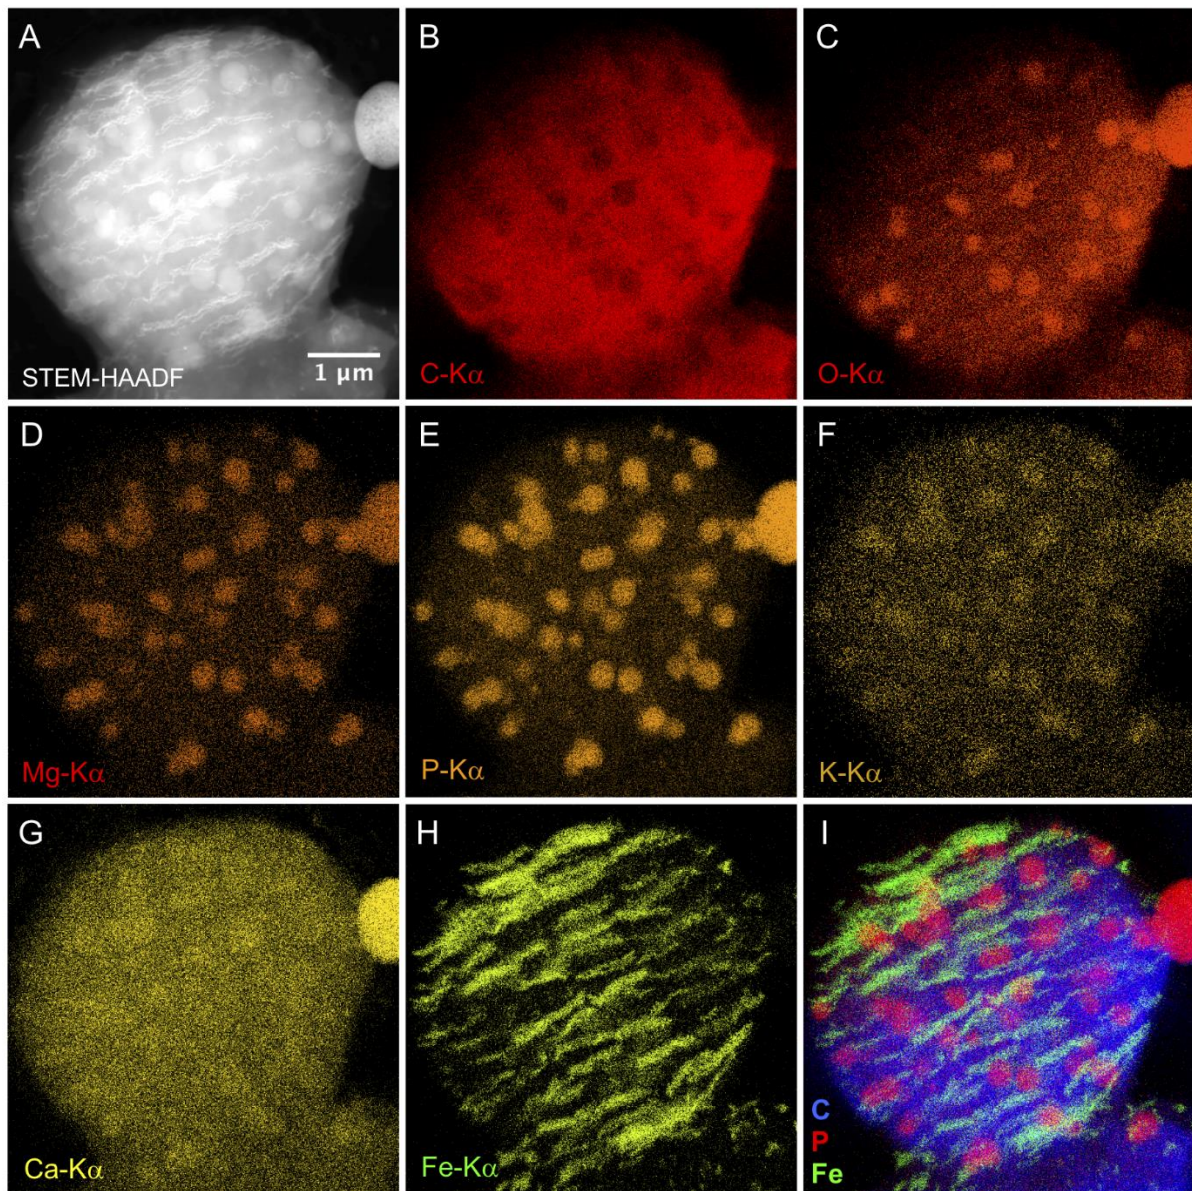

137

138 Figure 1. Magnetosome chains and vacuolar granules in ellipsoidal magnetoglobules. STEM-HAADF (A) and  
139 STEM-XEDS elemental maps (B – H) of a magnetoglobule. Composite image of Carbon, Phosphorus and Iron  
140 (I).

141

142 Magnetoglobules may undergo extensive membrane remodeling process

143 TEM inspection of ultrathin sections of high-pressure freezing/freeze substitution fixation  
144 (HPF/FS) samples showed vesicles with diameters from 35.5 nm to 57.8 nm in core lumen (red  
145 arrows in Figure 2A), in the out-surface matrix (Figure 2A and 2C) and in the periplasm of  
146 cells where they appeared like multivesicular body (Figure 2D). Nil red-stainable lipid granules  
147 were surrounded by a slightly electron-dense circle, which suggested a polymer coating on the  
148 granules (Figure 2A). Periphery bars exhibited a filamentous structure with a width of  $30.0 \pm$   
149  $9.0$  nm and length of  $363.4 \pm 146.7$  nm (yellow arrows in Figure 2A and 2B). Remarkably, the  
150 cytoplasm of the cells was filled with “C” and “S” shaped open rings (blue arrows in Figure



151 **2A**), or tubular rods with width of  $72.8 \pm 6.6$  nm and length of  $337.7 \pm 103.4$  nm (green arrows),  
152 which recalls the morphology of the Vipp1 oligomer observed in the cyanobacterium  
153 *Synechocystis* PCC 6803<sup>34</sup>. Formation of these structures may depend on an extensive  
154 membrane remodeling.

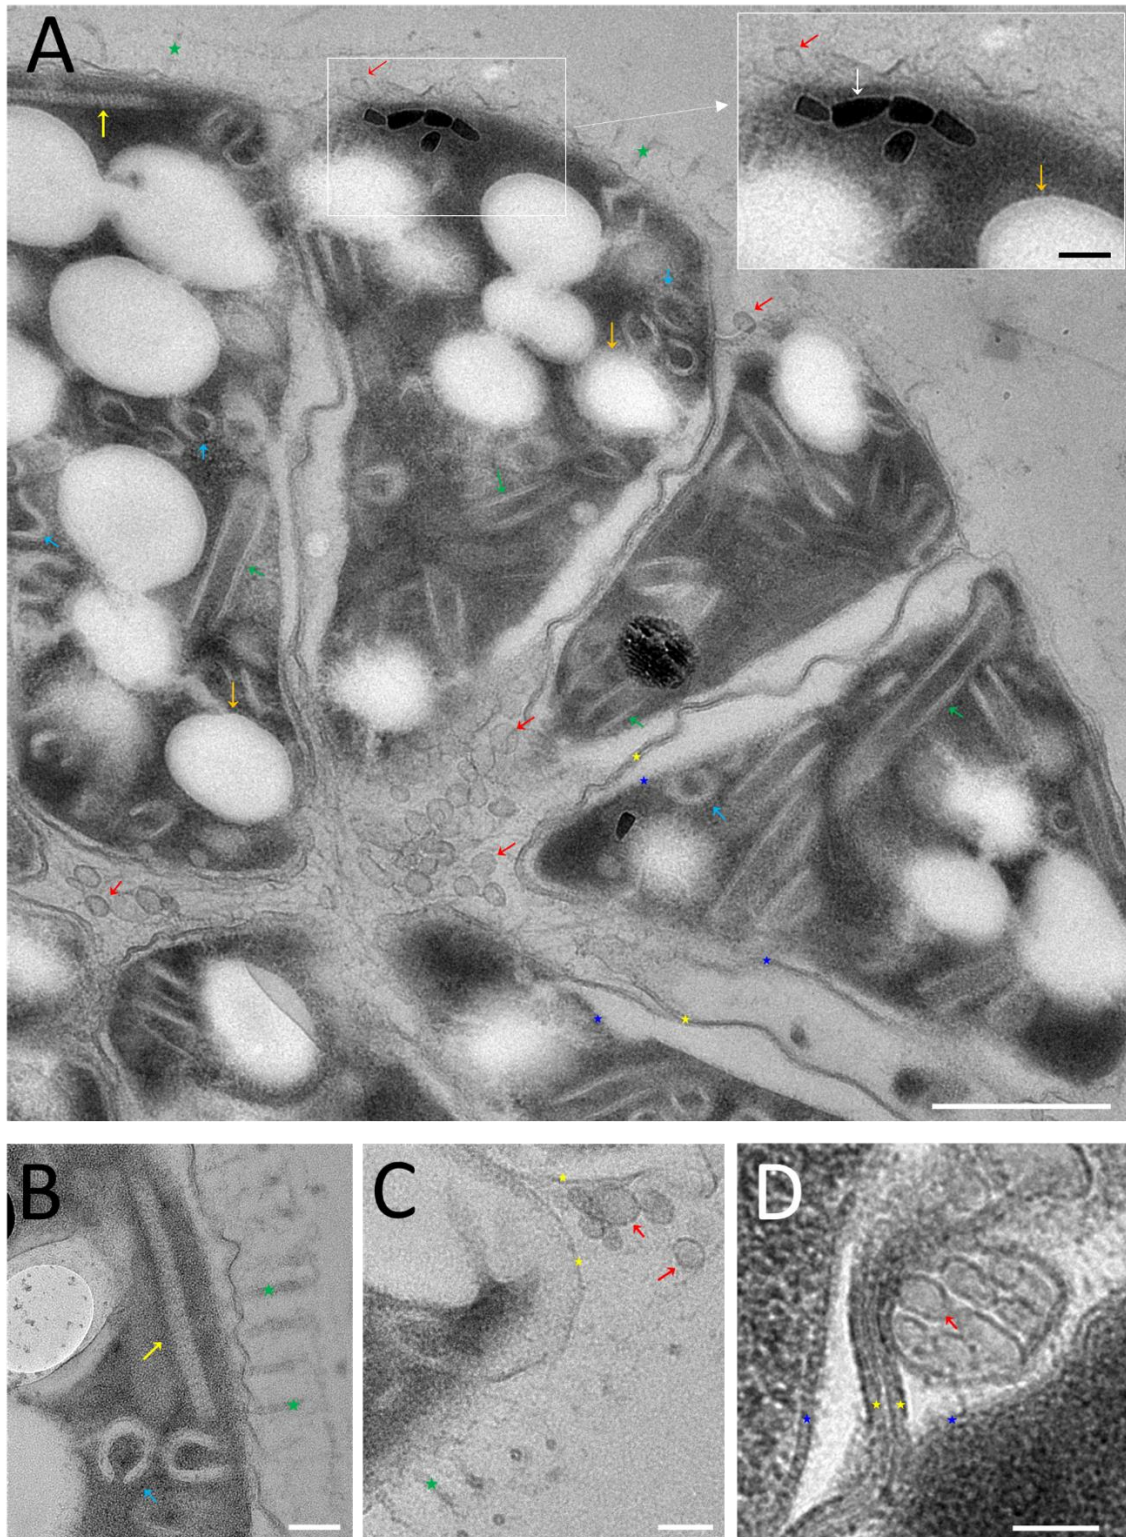

155

156 Figure 2. Vesicles and filamentous structures in ellipsoidal magnetoglobules. Micrographs of ultrathin sections of  
157 HPF/FS-fixed ellipsoidal magnetoglobules show vesicles (red arrows) in the core lumen (A), in the out-surface  
158 matrix (A and C), and appeared as multivesicular body in the periplasm of cells (D). Magnetosomes are indicated  
159 by white arrow in (A). Filaments are shown by yellow arrows (A and B). Orange arrows point to Nil red-stainable  
160 lipid granules. Intracellular tubular rods are indicated by green arrows (A). Cyan arrows show “C” or “S” rings  
161 (A and B). Yellow and blue asterisks show the outer and inner membranes, respectively (A, C and D). Green  
162 asterisks show the flagella (A, B and C). Scale bars indicate 500 nm in (A) and 100 nm in (A)-inset and other  
163 panels.

164

### 165 Genome sequence of magnetoglobules

166 To analyze the presence of membrane-remodeling gene in magnetoglobules, we isolated  
167 magnetoglobules from environmental samples collected from the China Sea and the  
168 Mediterranean Sea and sequenced genomes of 4 ellipsoidal and 5 spherical magnetoglobules  
169 (Table 1). The assembled genomes had an average completeness of  $94.9 \pm 2.4\%$  and  
170 contamination of  $3.0 \pm 1.2\%$ . The four ellipsoidal magnetoglobules with average genome size  
171 10.1 Mbp (9.8 to 10.8 Mbp) and GC content about 34% were all assembled into pseudo-  
172 chromosomal level genome with only one scaffold, and the number of contigs ranged from 216  
173 to 622. Compared to the ellipsoidal magnetoglobule genomes, those of spherical  
174 magnetoglobules showed higher variations in size (ranging from 8.8 to 11.4 Mbp) and GC  
175 content (29.9 to 36.4%). Based on the 16S rRNA gene identity, genomic average nucleotide  
176 identity (ANI) and the GTDB-Tk taxonomic annotation using the relative evolutionary  
177 divergence (RED), the spherical magnetoglobules were classified into 5 species of 3 genera  
178 and the 4 ellipsoidal magnetoglobules into 3 species of the same genus (Table S1), using the  
179 cutoff values (Same species: 16S rRNA gene sequence identity > 97%, ANI > 95%, RED >  
180 0.85, Different genus: 16S rRNA gene sequence identity < 92%, ANI < 83%,  $0.7 < \text{RED} <$   
181  $0.85$ ) published in <sup>35-37</sup>. The higher taxonomic diversity of spherical magnetoglobules was  
182 consistent with the bigger difference of their genome sizes compared to the ellipsoidal  
183 magnetoglobule genomes. The five spherical magnetoglobules were classified into *Candidatus*  
184 *Magnetopila* (for ZJ64 and ZJ12) and *Candidatus Magnetoradium* (ZJW7) two novel genera,  
185 and *Candidatus Magnetomorum zhanjiangroseum* (ZJ63) and *Candidatus Magnetomorum*  
186 *huiquanroseum* (QDA1) two novel species (Table 1). The four ellipsoidal magnetoglobules  
187 were affiliated to *Candidatus Magnetanas* genus, two previously named species *Candidatus*  
188 *Magnetanas rongchenensis* (RCG1) and *Candidatus Magnetanas tsingtaoensis* (QDG1)  
189 and a new species *Candidatus Magnetanas bruscensis* (for SF-25 and SF-35). The five  
190 spherical and four ellipsoidal magnetoglobules all belonged to Deltaproteobacteria,  
191 Desulfobacterales, Desulfobacteraceae.

192

193 Table 1. General genomic information of magnetoglobules

| Sample | Name                             | RCG1_eMMP                                  | QDG1_eMMP                                  | SF25_eMMP                               | SF35_eMMP                               | ZJW7_sMMP                                        | ZJ64_sMMP                                 | ZJ12_sMMP                                    | ZJ63_sMMP                                      | QDA1_sMMP                                    | GER_HK1_sMMP                            | BRA_ATBP_sMMP                                   |
|--------|----------------------------------|--------------------------------------------|--------------------------------------------|-----------------------------------------|-----------------------------------------|--------------------------------------------------|-------------------------------------------|----------------------------------------------|------------------------------------------------|----------------------------------------------|-----------------------------------------|-------------------------------------------------|
|        | Nomenclature                     | <i>Candidatus Magnetanas rongchenensis</i> | <i>Candidatus Magnetanas tsingtaoensis</i> | <i>Candidatus Magnetanas bruscensis</i> | <i>Candidatus Magnetanas bruscensis</i> | <i>Candidatus Magnetoradiorium zhanjiangense</i> | <i>Candidatus Magnetopila jinshaensis</i> | <i>Candidatus Magnetopila zhanjiangensis</i> | <i>Candidatus Magnetomorum zhanjiangroseum</i> | <i>Candidatus Magnetomorum huiquanroseum</i> | <i>Candidatus Magnetomorum sp. HK-1</i> | <i>Candidatus Magnetoglobus multicellularis</i> |
|        | Origin                           | Rongcheng, China                           | Qingdao, China                             | Six-fours, France                       | Six-fours, France                       | Zhanjiang, China                                 | Zhanjiang, China                          | Zhanjiang, China                             | Zhanjiang, China                               | Qingdao, China                               | Brazil <sup>d</sup>                     | North Sea <sup>e</sup>                          |
|        | MMPs No <sup>a</sup>             | 10-15                                      | 7                                          | 1                                       | 3                                       | 2                                                | 9                                         | 3                                            | 2                                              | 15                                           |                                         |                                                 |
|        | Sequencing Strategy <sup>b</sup> | WGS (PE250)                                | stLFR                                      | WGS (PE250)                             | WGS (PE250) Pacbio                      | WGS (PE100)                                      | stLFR                                     | WGS (PE100)                                  | WGS (PE100)                                    | stLFR ONT                                    | WGS                                     | WGS                                             |
|        | Scaffold No                      | 1                                          | 1                                          | 1                                       | 1                                       | 377                                              | 109                                       | 677                                          | 255                                            | 9                                            |                                         |                                                 |
|        | Genome Size (bp)                 | 9,841,280                                  | 10,775,752                                 | 9,833,901                               | 9,996,095                               | 9,237,466                                        | 9,045,818                                 | 8,868,014                                    | 10,615,663                                     | 11,371,743                                   |                                         |                                                 |
|        | Scaffold N50 (bp)                | 9,841,280                                  | 10,775,752                                 | 9,833,901                               | 9,996,095                               | 42,009                                           | 269,024                                   | 20,588                                       | 79,165                                         | 9,283,519                                    |                                         |                                                 |
|        | Contig No                        | 627                                        | 322                                        | 578                                     | 216                                     | 777                                              | 638                                       | 874                                          | 355                                            | 203                                          | 3,036                                   | 3705                                            |
|        | Contig Length (bp)               | 9,809,828                                  | 9,619,577                                  | 9,718,261                               | 9,785,653                               | 9,155,065                                        | 8,877,793                                 | 8,790,504                                    | 10,606,005                                     | 11,275,150                                   | 14,290,418                              | 12,453,848                                      |
|        | Contig N50 (bp)                  | 32,545                                     | 61,880                                     | 37,549                                  | 100,351                                 | 30,562                                           | 25,666                                    | 18,346                                       | 66,564                                         | 87,834                                       | 17,962                                  | 6,143                                           |
|        | GC Content (%)                   | 34.07                                      | 34.10                                      | 34.21                                   | 34.63                                   | 34.78                                            | 29.99                                     | 29.86                                        | 35.96                                          | 36.39                                        | 34.61                                   | 37.27                                           |
|        | Completeness (%) <sup>c</sup>    | 95.16                                      | 95.16                                      | 90.32                                   | 94.52                                   | 97.10                                            | 94.39                                     | 93.10                                        | 97.74                                          | 96.45                                        | 96.94                                   | 98.21                                           |
|        | Contamination (%) <sup>c</sup>   | 3.46                                       | 3.89                                       | 4.89                                    | 2.04                                    | 1.24                                             | 3.97                                      | 1.64                                         | 2.60                                           | 3.23                                         | 3.57                                    | 19.24                                           |
|        | Gene No                          | 7,362                                      | 7,497                                      | 7,357                                   | 7,391                                   | 5,582                                            | 5,859                                     | 5,536                                        | 6,751                                          | 7,550                                        | 11,022                                  | 9,987                                           |
|        | Gene Length (bp)                 | 8,048,623                                  | 8,183,913                                  | 8,265,386                               | 8,445,666                               | 7,660,253                                        | 7,484,438                                 | 7,508,479                                    | 9,433,499                                      | 9,532,691                                    | 12,569,802                              | 9,531,962                                       |
|        | Average Len (bp)                 | 1093.27                                    | 1091.63                                    | 1123.47                                 | 1142.70                                 | 1,372                                            | 1277.43                                   | 1356.30                                      | 1397.35                                        | 1262.61                                      | 1140.43                                 | 954.44                                          |
|        | Gene Density (%)                 | 81.78                                      | 80.68                                      | 84.05                                   | 84.49                                   | 83.26                                            | 82.84                                     | 85.32                                        | 88.86                                          | 83.83                                        | 87.96                                   | 76.54                                           |

194

195 a: number of MMPs collected by micromanipulation for genome DNA extraction. b: genome sequencing was  
 196 performed using the approaches of whole-genome shotgun sequencing (WGS PE250 or PE100); Pacbio; single  
 197 tube Long Fragment Read (stLFR); Oxford Nanopore Technologies (ONT). c: analyzed using checkM. d: from  
 198 Abreu et al 2014<sup>38</sup>. e: from ref Kolinko et al 2014<sup>39</sup>.

199

200 We analyzed the evolution of MTBs using 120 bacterial single-copy proteins in the nine  
 201 magnetoglobule genomes sequenced here, forty-four unicellular MTB and two sMMP  
 202 genomes available in GTDB. As shown in Figure 3, genomes from Ombitrophus and Nitrospira  
 203 were clustered together as a branch connected to the Proteobacteria lineage. The large lineage  
 204 of Proteobacteria was composed of two distinct clades. One contained alphaproteobacterial  
 205 MTB, etaproteobacterial MTB and gammaproteobacterial MTB subclades. The other had a  
 206 deltaproteobacterial origin containing the genomes of both unicellular and multicellular MTB.  
 207 Four unicellular *Desulfovibrio* sp. (IFRC170, MBC34, RS-1 and UBA700) formed the  
 208 subclade that was removed from the unicellular *Desulfamplus magnetovallimortis* BW-1 and  
 209 all magnetoglobules. Notably, spherical and ellipsoidal magnetoglobules were clustered into  
 210 the subclade of magnetoglobule. Among all available genomes in GTDB, the non-magnetic  
 211 multicellular filamentous bacterium *Desulfonema ischimonotii* Tokyo 01<sup>T</sup> was the most closely  
 212 related to magnetoglobules (Figure 3). They clustered together as a multicellular  
 213 deltaproteobacterial subclade that was linked to a unicellular subclade consisting of unicellular  
 214 MTB *D. magnetovallimortis* BW-1 and non-magnetic *Desulfobacterium autotrophicum*  
 215 HRM2. This result indicates that a unicellular deltaproteobacterial ancestor (Figure 3, red  
 216 asterisk) diverged into unicellular and multicellular deltaproteobacteria. The multicellular  
 217 branch evolved in non-magnetic filamentous *D. ischimonotii* and magnetotactic  
 218 magnetoglobules that further diverged to spherical and ellipsoidal magnetoglobules.



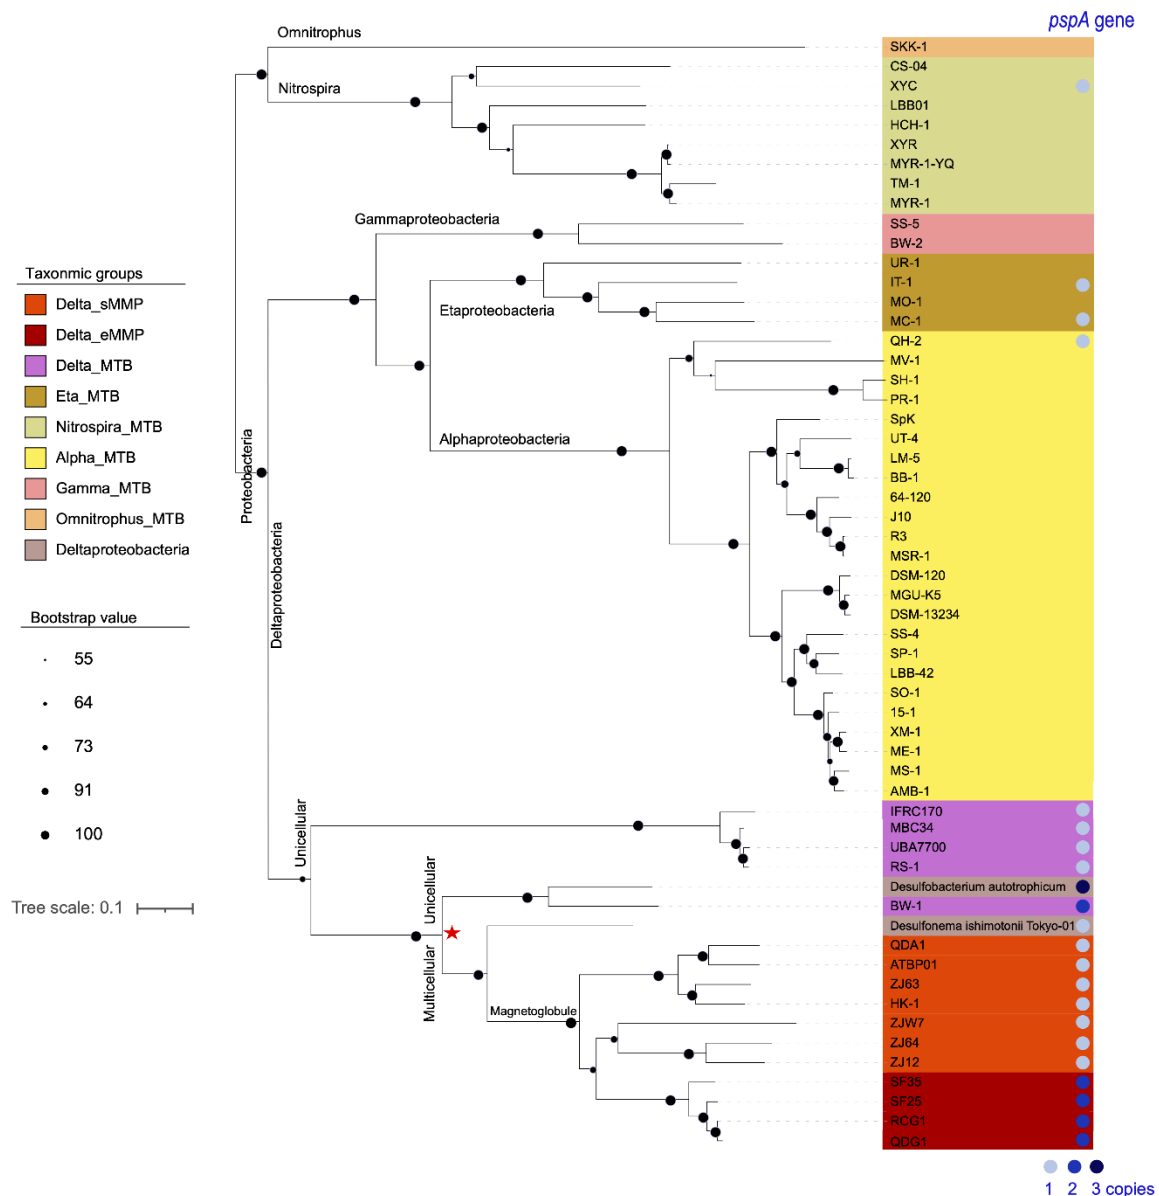

219

220 Figure 3. Phylogeny of MTB based on GTDB analysis. Genome phylogenetic tree of 44 unicellular MTB, 11  
 221 multicellular magnetoglobules and two non-magnetotactic *Desulfobacteraceae* genomes based on 120 bacterial  
 222 single-copy proteins with high branch support values. The red asterisk suggests an ancestor for the unicellular and  
 223 multicellular magnetotactic bacteria. Distribution of *pspA* in MTB is indicated on right beside the access or species  
 224 names. Light-blue circle, blue circle and dark-blue circle mean, respectively, 1, 2 or 3 copies of *pspA* detected in  
 225 the corresponding genome whereas no circle means no *pspA* found in the genome.

226

227 To determine the magnetotactic origin of magnetoglobules we studied the phylogeny of *mamB*  
 228 and *mamM* genes that are essential for the membrane biogenesis of magnetosomes<sup>14,15,17,18</sup>.  
 229 Both MamB and MamM clustered together at class level in consistence with their taxonomic  
 230 affiliation (Figure 4). MamB and MamM phylogenetic trees of deltaproteobacterial MTB both  
 231 consisted of a magnetite specific clade and a greigite-related clade, which diverged from a

232 common ancestor of deltaproteobacterial MTB. Notably, the two proteins of multicellular  
 233 magnetoglobules were clustered together with those from the unicellular MTB. Therefore,  
 234 magnetoglobules acquired magnetosome genes before divergence between magnetite and  
 235 greigite magnetosomes and shared the same origin with unicellular MTBs. It is likely that  
 236 magnetoglobules evolved from a unicellular magnetotactic bacteria.

237

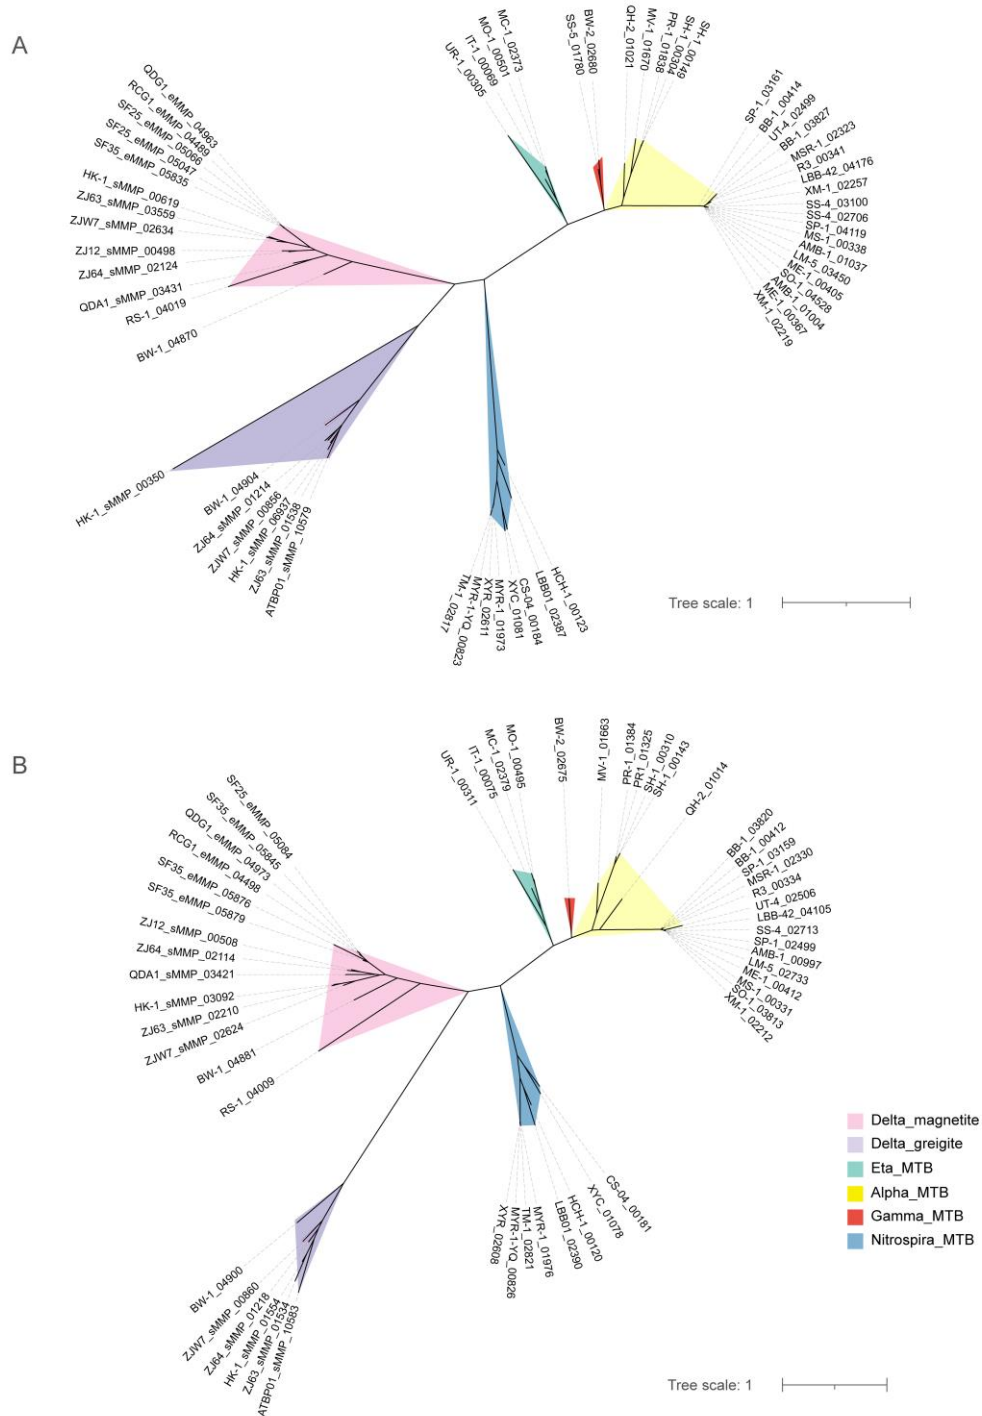

238

239 Figure 4. Phylogeny of *mam* genes essential for magnetosome membrane biogenesis. The phylogenetic tree of  
240 MamB (A) and MamM (B) proteins from unicellular MTB and multicellular magnetoglobules was constructed  
241 using iq-tree software based on their alignment using clustalW2 software, respectively. The taxonomic and  
242 magnetosome composition groups were shown with pink (Delta\_magnetite), purple (Delta\_greigite), green  
243 (Eta\_MTB), yellow (Alpha\_MTB), red (Gamma\_MTB), or blue (Nitrospira\_MTB) color.

244

#### 245 ESCRT-III proteins are not required for magnetosome biogenesis

246 Analysis of MTB genomes showed that all deltaproteobacterial MTB had the *pspA* gene  
247 (Figure 3). Moreover, the genomes of the unicellular *D. magnetovallimortis* BW-1 and all  
248 ellipsoidal magnetoglobules had two copies of *pspA*. Half etaproteobacterial MTB and only  
249 one of the 24 alphaproteobacterial MTB or one of the 8 nitrospirial MTB had the *pspA* gene  
250 (Figure 3). The two gammaproteobacterial and the omnitrophus MTB had no *pspA*. Non-  
251 magnetotactic *D. autotrophicum* HRM2 and *D. ishimotonii* Tokyo 01<sup>T</sup> had three and one copies  
252 of *pspA*, respectively (Figure 3). The large genome size (5.6 Mbp) and high number of genome  
253 plasticity elements (> 100 transposon-related genes) might explain the high copy number of  
254 *pspA* in strain HRM2. Among the most extensively studied MTB, the alphaproteobacterial  
255 MTB *M. magnetotacticum* AMB-1 and *M. gryphiswaldense* MSR-1 had no *pspA*, but the  
256 deltaproteobacterial MTB *D. magneticus* RS-1 had it. Therefore, distribution of *pspA* is  
257 variable in different taxa, and the membrane-remodeling protein PspA is unlikely required for  
258 the biogenesis of magnetosomes.

#### 259 Phylogenetic comparison of MTB PspA with those of other bacteria and archaea

260 Magnetoglobules exhibit conspicuous morphology distinct from other multicellular bacteria  
261 and are rich in intracellular vesicles, open rings and tubular rods (Figure 2). All  
262 magnetoglobules have PspA and ellipsoidal magnetoglobules have even two copies. The  
263 question is whether the membrane-remodeling protein is involved in vesicle biogenesis and the  
264 multicellular morphogenesis. We analyzed the phylogenetic relationship of MTB PspA with  
265 those of other bacteria and archaea. Remarkably, magnetoglobule PspA and those of the non-  
266 magnetic multicellular filamentous bacterium *D. ishimotonii* Tokyo 01<sup>T</sup> and unicellular  
267 deltaproteobacterium *D. autotrophicum* HRM2 clustered in a distinct clade that was separated  
268 from other unicellular MTBs and was especially far away from those of other unicellular  
269 deltaproteobacterial MTB, except one of the two copies of the unicellular MTB bacterium *D.*  
270 *magnetovallimortis* BW-1 (Figure 5A). More detailed analysis showed that the  
271 magnetoglobule clade was composed of PspA of multicellular magnetoglobules, nonmagnetic  
272 filamentous *D. ishimotonii* Tokyo 01<sup>T</sup> and one of the three copies of PspA of *D. autotrophicum*  
273 HRM2 (Figure 5B). Notably, the second copy of ellipsoidal magnetoglobule PspA clustered  
274 together with relatively weak bootstrap value and far away from other PspA. These results  
275 would suggest that *pspA* evolved before occurrence of multicellularity and that it was followed  
276 by the *pspA* gene duplication for specialization for ellipsoidal morphogenesis.



A

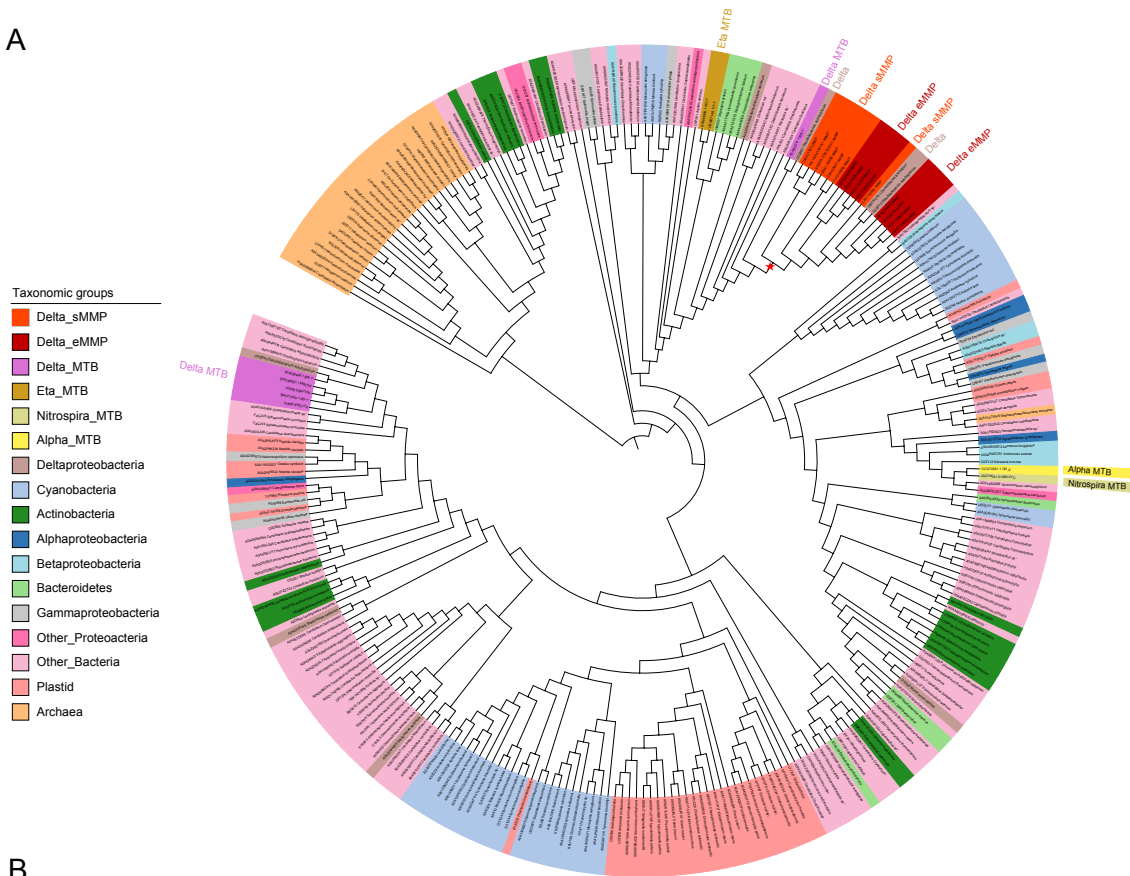

B

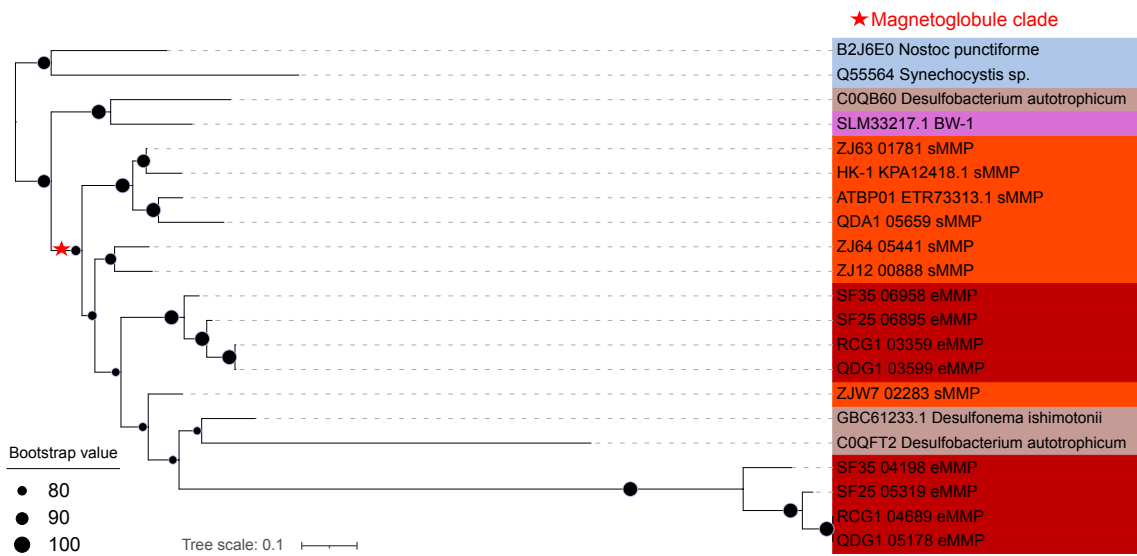

277

278

279 Figure 5. Distribution and phylogenetic analysis of PspA in archaea and bacteria. (A) Phylogenetic tree of 264  
280 representative PspA sequences reported by Liu *et al.*<sup>3</sup> (included 26 archaeal, 37 Chloroplast plastid and 201  
281 bacterial sequences) and 27 PspA sequences found in unicellular MTB, multicellular magnetoglobules and the  
282 multicellular filamentous *Desulfonema ischimonii* Tokyo 01<sup>T</sup>. Compared with other bacteria, all the PspA  
283 sequences in magnetoglobules formed a distinct clade (red asterisk). (B) More detailed analysis of the  
284 magnetoglobule clade. A long branch separates the PspA of *D. ischimonii* Tokyo 01<sup>T</sup> and the second copy of  
285 eMMPs from the PspA of sMMPs and the first copy of eMMPs. The taxonomic color code is the same as in (A).

286

### 287 Hetero-expression of ellipsoidal magnetoglobule *pspA* genes in *E. coli* cells

288 Despite sharing low sequence identity, ESCRT-III proteins exhibit the same secondary  
289 structure. Their N-terminal ESCRT-III core domain has four  $\alpha$ -helices that fold into a hairpin  
290 motif. Additional  $\alpha$ -helices ( $\alpha 5$  and  $\alpha 6$ ) at the C-terminus might have regulatory function. In  
291 the cytoplasm at the free state, the regulatory  $\alpha 5$  and  $\alpha 6$  fold over the ESCRT-III core domain,  
292 in a “closed” conformation, and inhibit polymerization. Interaction of ESCRT-III with the  
293 membrane triggers the relief of the auto-inhibition, leading to a conformational change of the  
294 proteins into their “open” form and assembly into higher-order structures<sup>3</sup>. We used AlphaFold  
295 to predict the secondary structures and found that the PspA of all spherical magnetoglobules  
296 and PspA1 of ellipsoidal magnetoglobules (Figure S1, and as shown by PspA1\_eMMP of SF-  
297 35 in Figure 6, A1) had similar fold and were composed of additional alpha-helices, thus with  
298 a potential regulatory domain. All these PspA monomer exhibited a predicted open  
299 conformation as the human ESCRT-III CHMP1B and activated membrane-binding Snf7<sup>40</sup>. In  
300 contrast, the PspA2 of the four ellipsoidal magnetoglobules (Figure S1, and represented by  
301 PspA2\_eMMP of SF-35 in Figure 6, A2) had the well conserved  $\alpha 1$ - $\alpha 2/\alpha 3$  hairpin, but  
302 exhibited subsequent folding patterns distinct from PspA1. Their Hinge 2 (elbow) bended  $\alpha 4$   
303 to form an antiparallel alpha-helix structure with  $\alpha 2/\alpha 3$ , which is similar to the closed  
304 conformation of yeast ESCRT-III Snf7 and Vps24<sup>40</sup>. Such a structure might require interaction  
305 with the membrane or other components to release the inhibition and assemble into a diverse  
306 set of flexible polymers that contributes to the architecture and morphology of ellipsoidal  
307 magnetoglobules.

308

309 To assess membrane remodeling capacity of ellipsoidal magnetoglobule PspA proteins, we  
310 expressed the *pspA1* and *pspA2* genes of the *Candidatus* M. bruscensis SF-35 in *E. coli*. The  
311 6His-tag and Tev cleavage site were added at the N-terminus of these PspA proteins. IPTG  
312 induced the overexpression of the recombinant *pspA2* genes with sizes similar to the expected  
313 products (~30 kDa), but increased sizes for PspA1\_eMMP (~36 kDa versus 30.8 kDa) (Figure  
314 S2, A). Optical microscope analysis showed an increase of the median length of the cells from  
315 3.48  $\mu$ m for the strain carrying the plasmid vector to 4.21  $\mu$ m and 4.87  $\mu$ m for those expressing  
316 PspA1\_eMMP and PspA2\_eMMP, respectively (Figure S2, B). Consistently, laser confocal  
317 microscopy (Figure 6, B) and three-dimensional structured-illumination microscopy (3D-SIM)  
318 analyses (Figure S3) showed that the vector had no noticeable effect on cell division, but  
319 expression of multicellular PspA1\_eMMP and PspA2\_eMMP resulted in increased long  
320 undivided cells (Figure 6, B). Hydrophilic styryl dyes FM4-64 is capable of incorporating in  
321 the outer leaflet of the plasma lipid bilayer without penetration through the plasma membrane,

322 and its intercalation into hydrophobic membrane enhances the fluorescence. Therefore, FM4-  
323 64 is internalized exclusively by endocytic process and commonly used for the tracking of  
324 endocytosis and exocytosis in eukaryotic cells<sup>41,42</sup>. It is also suitable for fluorescence imaging  
325 of magnetoglobule membrane<sup>30</sup>. In *E. coli* strains carrying the plasmid vector pET-28 or  
326 expressing PspA1\_eMMP, FM4-64 stained the periphery of cells (Figure 6, B2 and Figure S3).  
327 In contrast, FM4-64 clearly aggregated at positions between DAPI stained DNA spots in the  
328 cytoplasm of the cells expressing PspA2\_eMMP (Figure 6, B3 and Figure S3). The intracellular  
329 location of bright red fluorescence indicated intercalated FM4-64 in hydrophobic membrane  
330 and implied membrane remodeling in the cells. We then labeled PspA2 by in-frame fusion of  
331 mNeonGreen between the Tev and PspA2. 3D-SIM (Figure 6, C1) and laser confocal (Figure  
332 6, C2) imaging showed that PspA2 was located at both poles of rod-shaped unicells and  
333 distributed as foci in filamentous cells. Membrane invagination was observed in 3D-SIM  
334 micrographs.

### 335 Cryo-electron tomography of *E. coli* cells expressing the *pspA2* gene

336 Cryo-electron tomography analysis was carried out to investigate the membrane structure of the *E. coli*  
337 cells expressing the *pspA2* gene. Filament bundles were observed in some cells (Figure 6, D1). In long  
338 filamentous cells, electron dense area was separated by electron weak area (Figure S4, Figure 6, D and  
339 E, green arrows), which was reminiscent to the patterns of regular distribution of mNeonGreen-PspA2  
340 spots as observed in laser confocal and 3D-SIM micrographs (Figure 6, C). Further detailed inspection  
341 of the tilt series and reconstruct them into 3D tomogram revealed that some electron dense, aggregate-  
342 like area at septum impaired the inward orientation of the constriction ring (Figure 6, D2). Invagination  
343 of inner membrane into cytoplasm as saccules was evident (Figure 6, D3, Movie S1). In addition,  
344 unilamellar and bilamellar vesicles were generated, and some of them were enclosed in a double  
345 membrane compartment that was reminiscent to multivesicular body or compartment of unconventional  
346 protein secretion (Figure 6, E). These structures imply that expression of the *pspA2* gene of *Candidatus*  
347 *M. bruscensis* SF-35 alone is sufficient to result in membrane remodeling in *E. coli* cells.



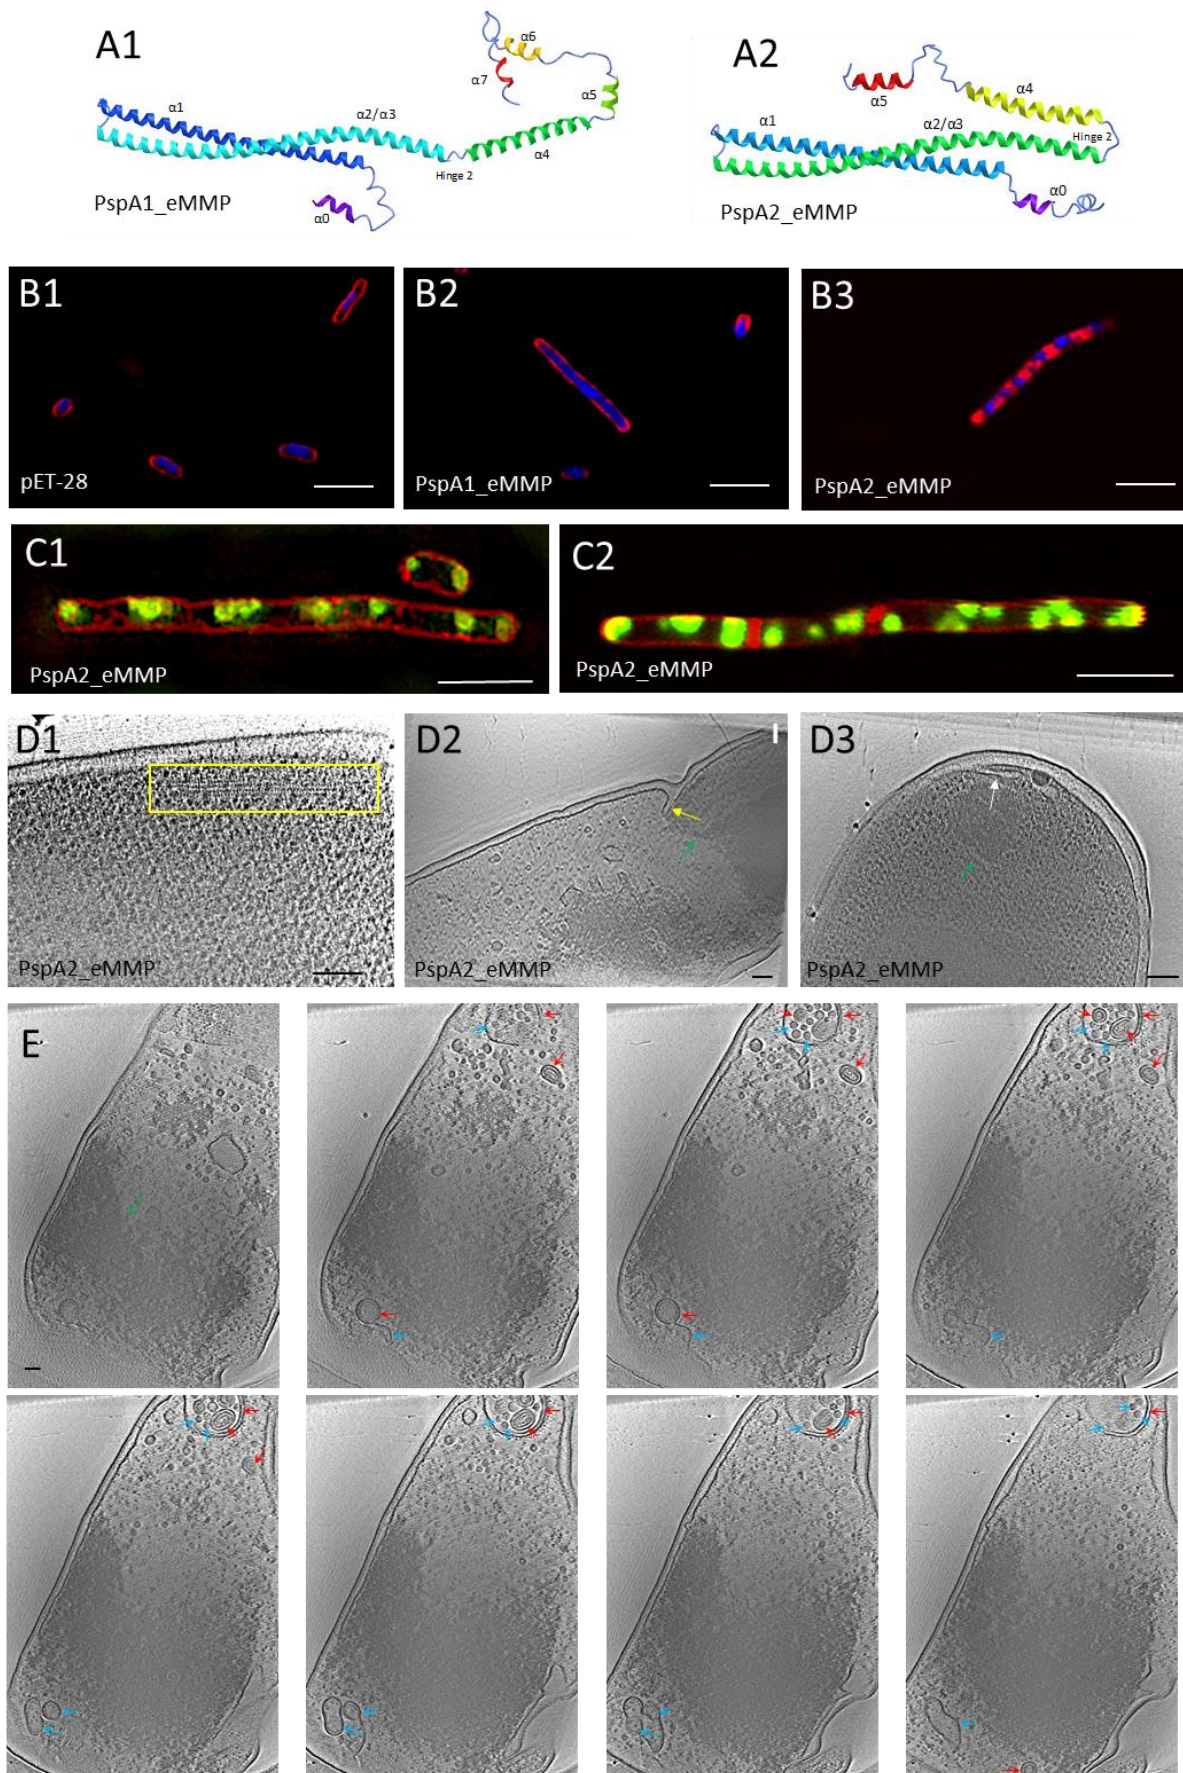

349 Figure 6 Morphology of *E. coli* cells expressing *pspA* genes of *Candidatus M. bruscensis* SF-35. AlphaFold  
350 predicated secondary structure of PspA1 (A1, PspA1\_eMMP) and PspA2 (A2, PspA2\_eMMP) monomer of SF35.  
351 (B) Laser confocal images of *E. coli* cells carrying vector pET-28 (B1) or its derivative plasmids expressing *pspA1*  
352 (B2, PspA1\_eMMP) or *pspA2* (B3, PspA2\_eMMP) of SF35. (C) 3D-SIM (C1) and Laser confocal (C2)  
353 microscope images show the polar location of mNeonGreen-PspA2 in unicell and regular distribution in  
354 filamentous cells expressing PspA2 fusions. The membrane is stained by FM4-64 (red) and DNA by DAPI (blue).  
355 mNeonGreen-PspA2 are in green color. (D) CET micrograph gallery shows filament bundles (D1, yellow square),  
356 affected septum (D2, yellow arrow) and membrane sacculus (D3, white arrow). Green arrows indicate electron  
357 dense area. Panel E shows tomograph of an *E. coli* cell expressing *pspA2* of SF35 with multivesicular body-like  
358 structure and formation of double membrane (red arrows) and single membrane (cyan arrow) vesicles. Scale bars  
359 are 5  $\mu$ m in B and C and 100 nm in D and E.

360

## 361 Discussion

362 Expansions of genome size during evolution seems to be a strategy used by bacteria for their  
363 adaptation to various environments. Myxobacteria are another multicellular  
364 deltaproteobacterial taxon dwelling in soils, river mud, deep-sea sediments and hydrothermal  
365 vents<sup>43</sup>. Sequencing of the largest genome (16.04 Mbp) of myxobacterium *Minisystis rosea*  
366 DSM 24000<sup>T</sup> and comparative genomics analysis of 22 myxobacterial genomes, ranging from  
367 4.35 Mbp to 16.04 Mbp with a median size of 11.53 Mbp, showed a strong positive correlation  
368 between genome size and number of genes involved in signal transduction or coding for  
369 secretome proteins<sup>44</sup>. Multicellular magnetoglobules had approximate double sizes (average:  
370 10.6 Mbp, n=11) compared to unicellular deltaproteobacterial MTB (average: 5.1 Mbp, n=5).  
371 Compared to the unicellular deltaproteobacterial MTBs, magnetoglobules COGs (Cluster of  
372 Orthologous Groups of proteins) were significantly expanded in T (Signal transduction  
373 mechanisms), U (Intracellular trafficking, secretion, and vesicular transport), O  
374 (Posttranslational modification, protein turnover, chaperones), Q (Secondary metabolites  
375 biosynthesis, transport and catabolism), K (Transcription), N (Cell motility), L (Replication,  
376 recombination and repair) and D (Cell wall/membrane/envelope biogenesis), as well as that of  
377 general function prediction only class (R) and function unknown class (S). On the contrary,  
378 contraction was obvious in some classes related to basic metabolism, such as P (Inorganic ion  
379 transport and metabolism), C (Energy production and conversion) and E (Amino acid transport  
380 and metabolism). Notably, multicellular magnetoglobules encoded more genes involved in  
381 signal transduction and transcription, which are particularly relevant for multicellularity as  
382 reported<sup>45,46</sup>. Gene family clustering analysis also revealed a significant increase (greater than  
383 5) of 58 orthologous proteins in magnetoglobules compared to unicellular deltaproteobacterial  
384 MTB. Among them 9 orthologous proteins were classified as filamentous haemagglutinin,  
385 cadherin, cadherin-like, cellulosome anchoring protein, Na-Ca exchanger/integrin-beta4, and  
386 fibronectin type III. These proteins might be responsible for cell adhesion and contributed to  
387 morphogenesis and development of multicellular organization.

388 Multicellular magnetoglobules might evolved from a non-magnetic unicellular ancestor to  
389 multicellular organisms and then obtained the magnetosome gene cluster (MGC) via horizontal  
390 gene transfer. Lefèvre *et al.* have collected non-magnetotactic MMPs (nMMP) from low-saline,  
391 nonmarine environments<sup>47</sup>. This report supports the hypothesis of emergency of  
392 magnetoglobules from unicellular non-magnetic bacterium via an intermediate stage of nMMP.

393 Alternatively, the ancestor of magnetoglobules was a unicellular MTB that evolved to  
394 multicellular magnetoglobules. During the evolution some of the descendants lost MGC and  
395 became non-magnetotactic, probably as in the case of nMMP, as well as the unicellular *D.*  
396 *autotrophicum* HRM2 and filamentous *D. ischimotonii* Tokyo 01<sup>T</sup> that are the most closely  
397 related to magnetoglobules. The fact that the phylogenetic positions of the *mamB* and *mamM*  
398 genes of magnetoglobules correspond to those on the genomic taxonomic tree indicates a  
399 vertical inheritance and evolution of MGC in magnetoglobules, which is in favor for the second  
400 hypothesis. Based on the phylogenetic results of whole genome and PspA, we propose the  
401 evolution of magnetoglobules from a unicellular magnetotactic deltaproteobacterium ancestor.

402 Intracellular compartmentation is a key step in the evolution of multicellularity and eukaryotic  
403 organisms. Development of intra- and intercellular compartments and exchange of nutrients  
404 and information among these compartments require extensive membrane remodeling. It has  
405 been reported that 19 types of bacterial compartments were observed in at least 23 phyla<sup>48-50</sup>.  
406 These compartments have been defined as a proteomically defined lumen bound by a lipid  
407 bilayer (membrane), a lipid monolayer, a proteinaceous coat or phase-defined boundary<sup>48</sup>.  
408 Besides the magnetosomes, magnetoglobules contain vesicles, lipid inclusions and  
409 polyphosphate granules, which can be also considered as cellular compartments. The  
410 membrane remodeling proteins might be required for generation of the membrane enclosed  
411 compartments such as thylakoids and magnetosomes. The requirement for the membrane  
412 remodeling proteins PspA, Imm30 and Vippp1 for thylakoid biogenesis has been well  
413 documented<sup>3,5,6,34,51</sup>. Our phylogeny analysis and experimental results reported by others rule  
414 out the requirement of PspA for the formation of magnetosomes<sup>12-15,17,18</sup>. Interestingly all  
415 magnetoglobules have PspA that form a detached clade and ellipsoidal magnetoglobules have  
416 the duplicated PspA2 paralogs. Consistent with the presence of these membrane-remodeling  
417 proteins, vesicles were found in the core lumen, in the out-surface matrix, and appeared as  
418 multivesicular body in the periplasm of cells (Figure 2). In addition, filaments, tubular rods and  
419 open ring structures were abundant in the cytoplasm of these cells. Intriguingly how the  
420 vesicles are severed in magnetoglobules that don't have counterpart of the Vps4 ATPase.  
421 Nevertheless, hetero-expression of magnetoglobule *pspA2* genes in *E. coli* resulted in the  
422 formation of vesicles, multivesicular body and filaments similar to those observed in  
423 magnetoglobule cells (Figure 6 versus Figure 2), showing a membrane remodeling capacity.

424 Division mechanism of Archaea is more complex than that of bacteria. Euryarchaeota possess  
425 FtsZ homologs and divide via an FtsZ-based mechanism that is similar to the bacterial division  
426<sup>52</sup>. Interestingly, in some orders of Crenarchaeota and the Asgard super-phylum of Archaea,  
427 cell division depends on Cdv (for cell division) machinery that consists of *cdvABC*<sup>53,54</sup>. CdvA  
428 is found only in archaea whereas CdvB and CdvC are homologous to the eukaryotic ESCRT-  
429 III and Vps4 (vacuolar protein sorting), respectively<sup>54</sup>. During Cdv-based division process,  
430 CdvA is targeted to the division site and recruit the other two Cdv components. The CdvB  
431 forms a contractile machinery to sever the membrane neck. CdvB are classified into  
432 Vps2/24/46 class and Vps20/32/60 class<sup>54</sup>. The CdvC, eukaryotic Vps4 homologous ATPase,  
433 interacts with MIM1 motif (leucine-rich motifs in Asgard) in the C-terminal helix of the  
434 Vps2/24/46 class ESCRT-III subunits, and MIM2 motif (proline-rich motifs in Asgard) in the  
435 C-terminus of Vps20/32/60 class subunits to disassemble the membrane abscission polymers



436 and turnover CdvB. The Cdv proteins function in exovesicle secretion, viral release, and cell  
437 division<sup>54</sup>. *Sulfolobus islandicus* REY15A has three ESCRT-III paralogs. Liu et al. have shown  
438 that ESCRT-III, ESCRT-III-1 and ESCRT-III-2 play a crucial role at different stages of  
439 membrane ingression during cell division and ESCRT-III-3 is essential for cell budding<sup>55</sup>. In  
440 Sulfolobales without CdvA, CdvB and CdvC are sufficient to generate exovesicles<sup>54</sup>.  
441 Magnetoglobule genomes encode only CdvB homologs, PspA1 and PspA2, with neither CdvA  
442 nor CdvC counterparts. Consistently, their PspAs didn't have MIM1 or MIM2 motifs ([Figure](#)  
443 [S5](#)). All magnetoglobules possess the complete FtsZ and Min machineries. Therefore,  
444 magnetoglobule cells can divide via the canonical bacterial FtsZ-based mechanism. Whether  
445 the PspAs are involved in magnetoglobule cell division is unknown. The ESCRT of budding  
446 yeast serves to mediate the turnover of cell-division proteins from the plasma membrane<sup>56</sup>, or  
447 to the control of membrane trafficking during cytokinesis<sup>57</sup> instead of a direct action in  
448 abscission. The PspA might be required essentially for the vesicle formation and probably is  
449 involved in the morphogenesis of ellipsoidal magnetoglobules. Synthetic biology analysis  
450 could partially circumvent the problem of missing of magnetoglobule cultures in determining  
451 the function of the membrane remodeling PspA proteins. High resolution structures of PspA  
452 homo- and hetero-polymers, both in vivo/situ in magnetoglobules and in synthetic cells or in  
453 vitro in various solutions with or without lipid, could shed light on the function of  
454 magnetoglobule PspA.

455 Bacterial PspA was first discovered in *E. coli*<sup>58</sup>. It is encoded by *pspABCDE* operon that is  
456 transcribed in opposite direction compared to that of the upstream *pspF* gene. *E. coli* PspA has  
457 dual functions. It forms PspA-PspF complex and blocks the activation of *pspABCDE*  
458 transcription by the enhancer-binding protein PspF. When phage pore-forming protein secretin  
459 pIV assembles in outer-membrane, the resulting membrane stress triggers the interaction of  
460 PspA with the membrane PspB-PspC complex and inner membrane, which releases PspF and  
461 activates the transcription of *pspABCDE*. PspA oligomers stabilize compromised areas of the  
462 inner membrane and maintains the membrane integrity. Other factors perturbing membrane  
463 such as mislocalization of secretin of protein secretion systems, impairment of protein export  
464 and environmental extremes can also enhance PspA production<sup>59</sup>. Magnetoglobules have only  
465 PspA, without PspBCDE components. However, they do possess type I, II, IV and VI secretion  
466 systems and corresponding secretin, e.g. PilQ. Therefore, PspA might play a role in  
467 maintaining the membrane integrity in magnetoglobules without PspB and PspC. Interestingly,  
468 pIV secretin-dependent induction of the Psp response and activation of the Psp response by  
469 heat shock has also been reported as independent of PspB and PspC in *E. coli*<sup>59,60</sup>.

470 In *E. coli*, PspA seems to be functionally linked with the cytoskeleton proteins MreB and RodZ  
471 that maintain rod-shape cellular morphology<sup>61-63</sup>. These results imply existence of  
472 unrecognized relationships between PspA membrane remodeling function and multicellular  
473 morphogenesis. Our phylogenetic analysis showed that most PspA from multicellular  
474 cyanobacteria trend to cluster in clades separated from those of mainly unicellular  
475 cyanobacteria ([Figure S6](#)). We initiated studies to evaluate morphogenesis function of PspA  
476 by hetero-expression of magnetoglobule PspA1 and PspA2 in *E. coli*. Their expression could  
477 result in filamentous morphotype of *E. coli*. In addition, hetero-expression of PspA2 led to the  
478 formation of multivesicular body-like structures, vesicles and filament bundles. Further

479 detailed studies are needed to identify the protein composition of these compartments and  
480 elucidate the mechanism of interference with cell division and separation. According to their  
481 *in vivo* function, ESCRT-III can be classified as essential, helpers or special membrane  
482 remodeling proteins<sup>54</sup>. PspA1 are clustered with other PspA whereas PspA2 form a separated  
483 clade. Therefore, duplication of PspA1 to create the second copy of PspA2 might be the  
484 requirement of the ellipsoidal morphogenesis.

485

## 486 **Methods**

### 487 **Sample collection and whole genome application**

488 Samples were collected from Yuehu Lake, Rongcheng city (RCG1), Huiquan Bay, Qingdao  
489 city (QDG1 and QDA1), Brusac lagoon, Six-Four les Plages, Southern France (SF25 and SF35)  
490 and Jinsha Bay, Zhanjiang city (ZJ64, ZJ12, ZJW7 and ZJ63). Magnetoglobules were micro-  
491 sorted using a TransferMan ONM-2D micromanipulator and a CellTram Oil manual hydraulic  
492 pressure-control system (IM-9B) equipped on a microscope (Olympus IX51), after magnetic  
493 enrichment from the Intertidal sediment<sup>39,64-66</sup>. One to fifteen micro-sorted magnetoglobules  
494 were stored in PBS, then whole genome amplification (WGA) was performed using the  
495 multiple displacement amplification (MDA) with REPLI-g Single Cell kit, according to the  
496 manufacturer's instructions<sup>25</sup>.

### 497 **Genome sequencing, assembly and annotation**

498 The WGA products were prepared for library construction using strategy of whole-genome  
499 shotgun sequencing (WGS), single tube Long Fragment Read sequencing (stLFR), respectively.  
500 The WGS libraries of RCG1, SF25 and SF35 were sequenced on Illumina MiSeq platform  
501 (BGI-Wuhan, China) to generate 250 bp paired-end raw reads. The WGS libraries of ZJ12,  
502 ZJW7, ZJ63 and stLFR libraries of QDG1, ZJ64, QDA1 were sequenced on BGISEQ-500  
503 platform (BGI-Qingdao, China) in 100 bp pair-end model. After performing quality trimming  
504 and filtering using SOAPnuke, the high-quality clean reads of WGS data were assembled using  
505 metaSPAdes (v3.14.1) with k-mer size from 33 to 113 by step 20, and the stLFR clean reads  
506 were assembled using Supernova (v2.1.1) as described before<sup>67</sup>.

507 For all primary assemblies, the MetaWRAP pipeline was performed for the metagenome  
508 binning by using “-metabat2 -maxbin -concoct” modules, and then using “bin\_refinement” and  
509 “reassemble\_bins” modules to generate the high-quality recovered genomes<sup>68</sup>. The genome  
510 quality was evaluated by using CheckM<sup>69</sup>, and the magnetoglobule draft genomes with lower  
511 contamination (<5%) and higher completeness (>90%) were obtained.

512 To construct the longer contiguity genomes, SLR-superscaffolder (v0.9.0)<sup>70</sup> was applied for  
513 the QDG1, ZJ64 and QDA1 genome scaffolding. Meanwhile, Oxford Nanopore Technologies  
514 (ONT) and PacBio continuous long read (CLR) sequencing were used for QDA1 and SF25  
515 respectively, and then SSPACE-LongRead (v1.1) and TGS-Gapcloser (v1.1.1)<sup>71</sup> were applied  
516 for genome scaffolding and gap closed. Furthermore, RaGOO (v1.1) was used for the genome  
517 scaffolding of the magnetoglobule genomes within the same genus, and GMcloser (v1.6) was  
518 used for gap closed by using WGS or stLFR sequencing reads with parameters “-mm 500 -mi  
519 95 -ms 1000 -l 300 -i 400 -d 100”, then Pilon (v 1.23) and GATK (v 3.4-0) were used to fix the

520 sequencing errors. Finally, four ellipsoidal magnetoglobule pseudo-chromosomal level  
521 genomes and five near complete spherical magnetoglobule genomes were obtained.

522 The general information of genomes were stated using Quast <sup>72</sup>, genes were predicted and  
523 annotated using Prokka <sup>73</sup> and Microbial Genome Annotation and Analysis Platform (MaGe,  
524 <https://mage.genoscope.cns.fr/microscope>) <sup>74</sup>. 16S rRNA identity and average nucleotide  
525 identity (ANI) were calculated by blast and FastANI, respectively. Sequencing, assembly and  
526 quality control flow was present in Supplementary information (Figure S7).

#### 527 Genome features and comparative genomic analyses

528 A concatenated alignment of the 120 bacterial single-copy proteins of the 9 magnetoglobules  
529 genomes together with the two public spherical magnetoglobules genomes, 44 unicellular MTB  
530 and 2 Deltaproteobacterial non-magnetic bacteria were analyzed using GTDB-tk (v.1.7.0)  
531 based on Genome Taxonomy Database (GTDB, release 202) <sup>75,76</sup>, then maximum likelihood  
532 (ML) genome phylogenetic tree was constructed using IQ-Tree (v2.0.4) <sup>77</sup>, and bootstrap values  
533 were calculated with 1000 replicates under the LG+R6 model test by -IQ-Tree with Bayesian  
534 information criterion (BIC). Magnetosome genes of magnetoglobules genomes were identified  
535 using the MagCluster <sup>78</sup>. The phylogenetic trees based on magnetosome proteins MamB and  
536 MamM were constructed by ML method using the software IQ-Tree. The *pspA* genes of  
537 magnetoglobules and unicellular MTB genomes, were searched in Pfam database with E-value  
538 < 1e-5 by using InterProScan (v5), and the phylogeny was inferred by using IQ-Tree under the  
539 best-fitting LG+C30+G+F model. All the phylogenetic trees were visualized and adjusted  
540 using iTOL (<https://itol.embl.de/>). The secondary structures of PspA sequences were predicted  
541 by AlphaFold2 using the pdb70 template mode <sup>79,80</sup>.

#### 542 Molecular and protein analyses

543 The *pspA1* and *pspA2* genes of SF35 were synthesized and cloned in pET-28a(+)-Tev plasmid  
544 (GenScript Biotech (Netherlands) BV), which were transformed in *E. coli* strain BL21(DE3).  
545 Using InFusion procedure, mNeonGreen gene was in-frame inserted between the Tev and  
546 PspA2 and transformed in BL21(DE3). Transformants were grown in LB media to OD<sub>600nm</sub> =  
547 0.4 to 0.6, and expression of *pspA* was induced by adding isopropylthio-β-D-galactoside (IPTG)  
548 to a final concentration of 0.5 or 2 μM. Four hours after the induction the cells were harvest by  
549 centrifugation, washed with PBS buffer, and used for microscopy or biochemistry analyses.  
550 Cells were broken by lyse-loading buffer and analyzed on 10% SDS-PAGE.

#### 551 Microscopy analyses

552 Routine optical microscopy observation was performed with Zeiss Axiostar Plus, Zeiss Axio  
553 Vert 200M, and Olympus BX51. To perform laser confocal analysis, cells were fixed with 4%  
554 paraformaldehyde for 2 hours at room temperature or overnight at 4°C, stained with 7.5 μg/ml  
555 FM4-64 (for membranes) and 2 μg/ml DAPI (for chromosomal DNA) and observed with the  
556 Olympus FV1000 microscope with laser 405 nm excitation and 425–475 nm emission for  
557 DAPI and 543 nm excitation and 555–655 nm emission for FM4-64. Images were collected at  
558 a series of focal levels at 0.17 μm intervals.

559 3D-SIM was performed on a microscope system (DeltaVision OMX SR, GE Healthcare UK  
560 Ltd). Images were acquired using a Plan Apo N × 60, 1.42 NA oil immersion objective lens



561 (Olympus, Tokyo, Japan) and two liquid-cooled sCMOs cameras (PCO, Kelheim, Germany).  
562 Imaging was performed using excitation at 488 nm during 10 ms at 50%T for mNeonGreen,  
563 and excitation at 568 nm during 50 ms at 30%T for FM4-64 dye. Fluorescence was respectively  
564 recovered with a 528/48 nm emission filter and a 609/37 nm emission filter. 3D-SIM images  
565 were realized by acquiring a z-stack of 11 images separated by 0.125  $\mu\text{m}$ . For each z-section  
566 15 images (5 phases and 3 rotations) were acquired. Images were then reconstructed using the  
567 DeltaVision OMX SoftWoRx 7.0 software package (GE Healthcare). The resulting size of the  
568 reconstructed images was of  $1024 \times 1024$  pixels from an initial set of  $512 \times 512$  raw images.  
569 The channels were then carefully aligned using alignment parameters from control  
570 measurements with Image registration calibration slide and 0.1  $\mu\text{m}$  TetraSpeck<sup>TM</sup> Fluorescent  
571 Microspheres (Molecular Probes, Eugene, OR, USA).

## 572 Electron Microscopy

573 Magnetotactic bacteria were pelleted, high-pressure frozen, freeze substituted, embedded in  
574 Epon resin (Medium Grade). Preparation of HPF/FS ultra-thin sections (60–90 nm) was the  
575 same as previously described in <sup>30</sup>. The samples were analyzed using a Tecnai 200 kV electron  
576 microscope (FEI) and digital acquisitions were made using a numeric camera (Eagle, FEI).

## 577 HAADF-STEM elemental composition analysis

578 Magnetoglobule granules were investigated using a JEM-2100F microscope (JEOL Ltd)  
579 operating at 200 kV equipped with a Schottky emitter, an ultra-high resolution (UHR) pole  
580 piece and an X-ray energy dispersive spectrometer (XEDS). HAADF-STEM was used for Z-  
581 contrast imaging. Chemical compositional analysis was performed by STEM-XEDS elemental  
582 mapping.

## 583 Cryo-electron tomography

584 A 5  $\mu\text{l}$  cell suspension containing 10 nm colloidal gold particles were deposited on the copper  
585 EM grids with holey carbon supported film (Quantifoil, 200mesh, R1/2). The EM grid were  
586 blotted with filter paper (Waterman, grade 1) and plunge-frozen in liquid ethane using gravity-  
587 driven plunger apparatus. The grids were transferred into the dewar filled with liquid nitrogen  
588 for the storage.

589 The tilt series were collected using a Titan Krios microscope equipped with 300 kV field  
590 emission gun and K3 summit direct detection camera. The images were collected at focus using  
591 a volta phase plate and energy filter with a 20-eV slit. SerialEM software were used to collect  
592 tilt series images <sup>81</sup>. The magnification of 26,000 was used and resulted in a physical resolution  
593 of 0.338 nm/pixel. The cumulative dose is 100e/ $\text{\AA}$ , distributed 35 tilt series images taken by  
594 dose symmetric scheme. The tilt angles are ranging from  $-51^\circ$  to  $+51^\circ$  at a step size of  $3^\circ$ . The  
595 initial starting tilt is collected at  $0^\circ$ . For every single tilt series collection, the dose-fractionated  
596 movie mode was used to generate 8 sub-frames per projection image. Collected dose-  
597 fractionated data were first subjected to the motion correction program to generate drift-  
598 corrected stack files <sup>82</sup>. The stack files were aligned using gold fiducial markers and volumes  
599 reconstructed by the weighted back-projection method, using IMOD <sup>83</sup>.

600

## 601 Data availability

602 The 9 magnetoglobule assembled genomes and the PspA, MamB and mamM gene sequences  
603 analyzed in this study have been deposited into China National GeneBank Sequence Archive

604 (CNSA, <https://db.cngb.org/cnsa/>) of China National GeneBank DataBase (CNGBdb) with  
605 accession number CNP0003599.

606

## 607 References

- 608 1 Henne, W. M., Buchkovich, N. J. & Emr, S. D. The ESCRT pathway. *Dev Cell* **21**, 77-91 (2011).
- 609 2 McCullough, J., Frost, A. & Sundquist, W. I. Structures, Functions, and Dynamics of ESCRT-  
610 III/Vps4 Membrane Remodeling and Fission Complexes. *Annu Rev Cell Dev Biol* **34**, 85-109  
611 (2018).
- 612 3 Liu, J. *et al.* Bacterial Vipp1 and PspA are members of the ancient ESCRT-III membrane-  
613 remodeling superfamily. *Cell* **184**, 3660-3673 e3618 (2021).
- 614 4 Cui, K. *et al.* Characterization and diversity of magnetotactic bacteria from sediments of  
615 Caroline Seamount in the Western Pacific Ocean. *Journal of Oceanology and Limnology* **39**,  
616 2027-2043 (2021).
- 617 5 Junglas, B. *et al.* PspA adopts an ESCRT-III-like fold and remodels bacterial membranes. *Cell*  
618 **184**, 3674-3688 e3618 (2021).
- 619 6 Gupta, T. K. *et al.* Structural basis for VIPP1 oligomerization and maintenance of thylakoid  
620 membrane integrity. *Cell* **184**, 3643-3659 e3623 (2021).
- 621 7 Lin, W. *et al.* Expanding magnetic organelle biogenesis in the domain Bacteria. *Microbiome*  
622 **8**, 152 (2020).
- 623 8 Uebe, R. & Schuler, D. Magnetosome biogenesis in magnetotactic bacteria. *Nat Rev*  
624 *Microbiol* **14**, 621-637 (2016).
- 625 9 Gareev, K. G. *et al.* Magnetotactic Bacteria and Magnetosomes: Basic Properties and  
626 Applications. *Magnetochemistry* **7**, 86 (2021).
- 627 10 Komeili, A., Li, Z., Newman, D. K. & Jensen, G. J. Magnetosomes are cell membrane  
628 invaginations organized by the actin-like protein MamK. *Science* **311**, 242-245 (2006).
- 629 11 Scheffel, A. *et al.* An acidic protein aligns magnetosomes along a filamentous structure in  
630 magnetotactic bacteria. *Nature* **440**, 110-114 (2006).
- 631 12 Raschdorf, O. *et al.* Genetic and Ultrastructural Analysis Reveals the Key Players and Initial  
632 Steps of Bacterial Magnetosome Membrane Biogenesis. *PLoS Genet* **12**, e1006101 (2016).
- 633 13 Stachowiak, J. C. *et al.* Membrane bending by protein-protein crowding. *Nat Cell Biol* **14**,  
634 944-949 (2012).
- 635 14 Grant, C. R., Wan, J. & Komeili, A. Organelle Formation in Bacteria and Archaea. *Annu Rev*  
636 *Cell Dev Biol* **34**, 217-238 (2018).
- 637 15 Murat, D., Quinlan, A., Vali, H. & Komeili, A. Comprehensive genetic dissection of the  
638 magnetosome gene island reveals the step-wise assembly of a prokaryotic organelle. *Proc*  
639 *Natl Acad Sci U S A* **107**, 5593-5598 (2010).
- 640 16 Hershey, D. M. *et al.* Magnetite Biomineralization in *Magnetospirillum magneticum* Is  
641 Regulated by a Switch-like Behavior in the HtrA Protease MamE. *J Biol Chem* **291**, 17941-  
642 17952 (2016).
- 643 17 Hershey, D. M. *et al.* MamO Is a Repurposed Serine Protease that Promotes Magnetite  
644 Biomineralization through Direct Transition Metal Binding in Magnetotactic Bacteria. *PLoS*  
645 *Biol* **14**, e1002402 (2016).
- 646 18 Uebe, R. *et al.* The cation diffusion facilitator proteins MamB and MamM of  
647 *Magnetospirillum gryphiswaldense* have distinct and complex functions, and are involved in  
648 magnetite biomineralization and magnetosome membrane assembly. *Mol Microbiol* **82**, 818-  
649 835 (2011).

- 650 19 Grant, C. R. *et al.* Distinct gene clusters drive formation of ferrosome organelles in bacteria.  
651 *Nature* **606**, 160-164 (2022).
- 652 20 Farina, M., Lins de Barros, H., Motta de Esquivel, D. & Danon, J. Ultrastructure of a  
653 magnetotactic microorganism. *Biol. Cell.* **48**, 85-88 (1983).
- 654 21 Rodgers, F. G. *et al.* Intercellular structure in a many-celled magnetotactic prokaryote. *Arch*  
655 *Microbiol* **154**, 18-22 (1990).
- 656 22 Keim, C. N., Martines, J. L., Lins de Barros, H., Lins, U. & Farina, M. in *Magnetoreception and*  
657 *Magnetosomes in Bacteria* (ed D. Schüler) 104-132 (Springer-Verlag, 2006).
- 658 23 Abreu, F. *et al.* Deciphering unusual uncultured magnetotactic multicellular prokaryotes  
659 through genomics. *ISME J* **8**, 1055-1068 (2013).
- 660 24 Kolinko, S., Richter, M., Glockner, F. O., Brachmann, A. & Schuler, D. Single-cell genomics  
661 reveals potential for magnetite and greigite biomineralization in an uncultivated  
662 multicellular magnetotactic prokaryote. *Environ Microbiol Rep* **6**, 524-531 (2014).
- 663 25 Chen, Y. R. *et al.* A novel species of ellipsoidal multicellular magnetotactic prokaryotes from  
664 Lake Yuehu in China. *Environ Microbiol* **17**, 637-647 (2015).
- 665 26 Dong, Y. *et al.* The detection of magnetotactic bacteria in deep sea sediments from the east  
666 Pacific Manganese Nodule Province. *Environ Microb Rep* **8**, 239-249 (2016).
- 667 27 Du, H.-J. *et al.* Temporal distributions and environmental adaptations of two types of  
668 multicellular magnetotactic prokaryote in the sediments of Lake Yuehu, China. *Environ.*  
669 *Microb. Rep.* **7**, 538-546 (2015).
- 670 28 Zhou, K. *et al.* A novel genus of multicellular magnetotactic prokaryotes from the Yellow Sea.  
671 *Environ Microbiol* **14**, 405-413 (2012).
- 672 29 Teng, Z. *et al.* Diversity and Characterization of Multicellular Magnetotactic Prokaryotes  
673 From Coral Reef Habitats of the Paracel Islands, South China Sea. *Frontiers in Microbiology* **9**  
674 (2018).
- 675 30 Qian, X. X. *et al.* Juxtaposed membranes underpin cellular adhesion and display unilateral  
676 cell division of multicellular magnetotactic prokaryotes. *Environ Microbiol* **22**, 1481-1494  
677 (2020).
- 678 31 Keim, C. N., Abreu, F., Lins, U., Lins de Barros, H. & Farina, M. Cell organization and  
679 ultrastructure of a magnetotactic multicellular organism. *J Struct Biol* **145**, 254-262 (2004).
- 680 32 Keim, C. N. *et al.* Multicellular life cycle of magnetotactic prokaryotes. *FEMS Microbiol Lett*  
681 **240**, 203-208 (2004).
- 682 33 Bücking, H. & Heyser, W. Elemental composition and function of polyphosphates in  
683 ectomycorrhizal fungi — an X-ray microanalytical study. *Mycological Research* **103**, 31-39  
684 (1999).
- 685 34 Fuhrmann, E. *et al.* The vesicle-inducing protein 1 from *Synechocystis* sp. PCC 6803 organizes  
686 into diverse higher-ordered ring structures. *Mol Biol Cell* **20**, 4620-4628 (2009).
- 687 35 Kim, M., Oh, H. S., Park, S. C. & Chun, J. Towards a taxonomic coherence between average  
688 nucleotide identity and 16S rRNA gene sequence similarity for species demarcation of  
689 prokaryotes. *Int J Syst Evol Microbiol* **64**, 346-351 (2014).
- 690 36 Jain, C., Rodriguez, R. L., Phillippy, A. M., Konstantinidis, K. T. & Aluru, S. High throughput ANI  
691 analysis of 90K prokaryotic genomes reveals clear species boundaries. *Nat Commun* **9**, 5114  
692 (2018).
- 693 37 Parks, D. H. *et al.* A standardized bacterial taxonomy based on genome phylogeny  
694 substantially revises the tree of life. *Nat Biotechnol* **36**, 996-1004 (2018).
- 695 38 Abreu, F. *et al.* Deciphering unusual uncultured magnetotactic multicellular prokaryotes  
696 through genomics. *ISME J* **8**, 1055-1068 (2014).
- 697 39 Kolinko, S. *et al.* Single-cell analysis reveals a novel uncultivated magnetotactic bacterium  
698 within the candidate division OP3. *Environ. Microbiol.* **14**, 1709-1721 (2012).

- 699 40 Alonso, Y. A. M., Migliano, S. M. & Teis, D. ESCRT-III and Vps4: a dynamic multipurpose tool  
700 for membrane budding and scission. *FEBS J* **283**, 3288-3302 (2016).
- 701 41 Betz, W. J., Mao, F. & Smith, C. B. Imaging exocytosis and endocytosis. *Curr Opin Neurobiol* **6**,  
702 365-371 (1996).
- 703 42 Bolte, S. *et al.* FM-dyes as experimental probes for dissecting vesicle trafficking in living plant  
704 cells. *J Microsc* **214**, 159-173 (2004).
- 705 43 Han, K. *et al.* Extraordinary expansion of a *Sorangium cellulosum* genome from an alkaline  
706 milieu. *Scientific Reports* **3**, 2101 (2013).
- 707 44 Pal, S., Sharma, G. & Subramanian, S. Complete genome sequence and identification of  
708 polyunsaturated fatty acid biosynthesis genes of the myxobacterium *Minicystis rosea* DSM  
709 24000(T). *BMC Genomics* **22**, 655 (2021).
- 710 45 Ocana-Pallares, E. *et al.* Divergent genomic trajectories predate the origin of animals and  
711 fungi. *Nature* **609**, 747-753 (2022).
- 712 46 Suga, H. *et al.* The *Capsaspora* genome reveals a complex unicellular prehistory of animals.  
713 *Nat Commun* **4**, 2325 (2013).
- 714 47 Lefèvre, C. T., Abreu, F., Lins, U. & Bazylinski, D. A. Nonmagnetotactic multicellular  
715 prokaryotes from low-saline, nonmarine aquatic environments and their unusual negative  
716 phototactic behavior. *Appl Environ Microbiol* **76**, 3220-3227 (2010).
- 717 48 Greening, C. & Lithgow, T. Formation and function of bacterial organelles. *Nat Rev Microbiol*  
718 **18**, 677-689 (2020).
- 719 49 Kerfeld, C. A., Aussignargues, C., Zarzycki, J., Cai, F. & Sutter, M. Bacterial  
720 microcompartments. *Nature Reviews Microbiology* **16**, 277-290 (2018).
- 721 50 Volland, J.-M. *et al.* A centimeter-long bacterium with DNA contained in metabolically active,  
722 membrane-bound organelles. *Science* **376**, 1453-1458 (2022).
- 723 51 Dobro, M. J. *et al.* Electron cryotomography of ESCRT assemblies and dividing *Sulfolobus*  
724 cells suggests that spiraling filaments are involved in membrane scission. *Mol Biol Cell* **24**,  
725 2319-2327 (2013).
- 726 52 Makarova, K. S., Yutin, N., Bell, S. D. & Koonin, E. V. Evolution of diverse cell division and  
727 vesicle formation systems in Archaea. *Nat Rev Microbiol* **8**, 731-741 (2010).
- 728 53 Lindas, A. C., Karlsson, E. A., Lindgren, M. T., Ettema, T. J. & Bernander, R. A unique cell  
729 division machinery in the Archaea. *Proc Natl Acad Sci U S A* **105**, 18942-18946 (2008).
- 730 54 Caspi, Y. & Dekker, C. Dividing the Archaeal Way: The Ancient Cdv Cell-Division Machinery.  
731 *Frontiers in Microbiology* **9** (2018).
- 732 55 Liu, J. *et al.* Functional assignment of multiple ESCRT-III homologs in cell division and budding  
733 in *Sulfolobus islandicus*. *Mol Microbiol* **105**, 540-553 (2017).
- 734 56 McMurray, M. A. *et al.* Genetic interactions with mutations affecting septin assembly reveal  
735 ESCRT functions in budding yeast cytokinesis. *Biol Chem* **392**, 699-712 (2011).
- 736 57 Bhutta, M. S., McInerney, C. J. & Gould, G. W. ESCRT function in cytokinesis: location,  
737 dynamics and regulation by mitotic kinases. *Int J Mol Sci* **15**, 21723-21739 (2014).
- 738 58 Brissette, J. L., Russel, M., Weiner, L. & Model, P. Phage shock protein, a stress protein of  
739 *Escherichia coli*. *Proc Natl Acad Sci U S A* **87**, 862-866 (1990).
- 740 59 Flores-Kim, J. & Darwin, A. J. The Phage Shock Protein Response. *Annu Rev Microbiol* **70**, 83-  
741 101 (2016).
- 742 60 Jovanovic, G., Engl, C. & Buck, M. Physical, functional and conditional interactions between  
743 ArcAB and phage shock proteins upon secretin-induced stress in *Escherichia coli*. *Mol*  
744 *Microbiol* **74**, 16-28 (2009).
- 745 61 Engl, C. *et al.* In vivo localizations of membrane stress controllers PspA and PspG in  
746 *Escherichia coli*. *Mol Microbiol* **73**, 382-396 (2009).



- 747 62 Jovanovic, G., Mehta, P., Ying, L. & Buck, M. Anionic lipids and the cytoskeletal proteins  
748 MreB and RodZ define the spatio-temporal distribution and function of membrane stress  
749 controller PspA in *Escherichia coli*. *Microbiology (Reading)* **160**, 2374-2386 (2014).
- 750 63 Manganelli, R. & Gennaro, M. L. Protecting from Envelope Stress: Variations on the Phage-  
751 Shock-Protein Theme: (Trends in Microbiology 25, 205-216; 2017). *Trends Microbiol* **25**, 242  
752 (2017).
- 753 64 Jogler, C. *et al.* Conservation of proteobacterial magnetosome genes and structures in an  
754 uncultivated member of the deep-branching Nitrospira phylum. *Proc Natl Acad Sci U S A* **108**,  
755 1134-1139 (2011).
- 756 65 Chen, H., Li, J., Wu, L.-F. & Zhang, W.-J. Morphological and phylogenetic diversity of  
757 magnetotactic bacteria and multicellular magnetotactic prokaryotes from a mangrove  
758 ecosystem in the Sanya River, South China. *Journal of Oceanology and Limnology* **39**, 2015-  
759 2026 (2021).
- 760 66 Zhang, R. *et al.* Characterization and phylogenetic identification of a species of spherical  
761 multicellular magnetotactic prokaryotes that produces both magnetite and greigite crystals.  
762 *Res Microbiol* **65**, 481-489 (2014).
- 763 67 Zhang, Z. *et al.* Comparison of different sequencing strategies for assembling chromosome-  
764 level genomes of extremophiles with variable GC content. *iScience* **24**, 102219 (2021).
- 765 68 Uritskiy, G. V., DiRuggiero, J. & Taylor, J. MetaWRAP-a flexible pipeline for genome-resolved  
766 metagenomic data analysis. *Microbiome* **6**, 158 (2018).
- 767 69 Parks, D. H., Imelfort, M., Skennerton, C. T., Hugenholtz, P. & Tyson, G. W. CheckM:  
768 assessing the quality of microbial genomes recovered from isolates, single cells, and  
769 metagenomes. *Genome Research* **25**, 1043-1055 (2015).
- 770 70 Guo, L. *et al.* SLR-superscaffolder: a de novo scaffolding tool for synthetic long reads using a  
771 top-to-bottom scheme. *BMC Bioinformatics* **22**, 158 (2021).
- 772 71 Xu, M. *et al.* TGS-GapCloser: A fast and accurate gap closer for large genomes with low  
773 coverage of error-prone long reads. *Gigascience* **9** (2020).
- 774 72 Gurevich, A., Saveliev, V., Vyahhi, N. & Tesler, G. QUAST: quality assessment tool for genome  
775 assemblies. *Bioinformatics* **29**, 1072-1075 (2013).
- 776 73 Seemann, T. Prokka: rapid prokaryotic genome annotation. *Bioinformatics* **30**, 2068-2069  
777 (2014).
- 778 74 Vallenet D *et al.* MicroScope: an integrated platform for the annotation and exploration of  
779 microbial gene functions through genomic, pangenomic and metabolic comparative analysis.  
780 *Nucleic Acids Research* (2019).
- 781 75 Parks, D. H. *et al.* GTDB: an ongoing census of bacterial and archaeal diversity through a  
782 phylogenetically consistent, rank normalized and complete genome-based taxonomy.  
783 *Nucleic Acids Res* **50**, D785-D794 (2022).
- 784 76 Chaumeil, P. A., Mussig, A. J., Hugenholtz, P. & Parks, D. H. GTDB-Tk: a toolkit to classify  
785 genomes with the Genome Taxonomy Database. *Bioinformatics* (2019).
- 786 77 Nguyen, L. T., Schmidt, H. A., von Haeseler, A. & Minh, B. Q. IQ-TREE: a fast and effective  
787 stochastic algorithm for estimating maximum-likelihood phylogenies. *Molecular Biology and*  
788 *Evolution* **32**, 268-274 (2015).
- 789 78 Ji, R., Zhang, W., Pan, Y. & Lin, W. MagCluster: a Tool for Identification, Annotation, and  
790 Visualization of Magnetosome Gene Clusters. *Microbiol Resour Announc* **11**, e0103121  
791 (2022).
- 792 79 Jumper, J. *et al.* Highly accurate protein structure prediction with AlphaFold. *Nature* **596**,  
793 583-589 (2021).
- 794 80 Mirdita, M. *et al.* ColabFold: making protein folding accessible to all. *Nature Methods* **19**,  
795 679-+ (2022).

796 81 Mastronarde, D. N. Automated electron microscope tomography using robust prediction of  
797 specimen movements. *J Struct Biol* **152**, 36-51 (2005).  
798 82 Li, X. *et al.* Electron counting and beam-induced motion correction enable near-atomic-  
799 resolution single-particle cryo-EM. *Nat Methods* **10**, 584-590 (2013).  
800 83 Kremer, J. R., Mastronarde, D. N. & McIntosh, J. R. Computer visualization of three-  
801 dimensional image data using IMOD. *J Struct Biol* **116**, 71-76 (1996).

802

### 803 [Acknowledgements](#)

804 We thank A. Bernadac for critical reading of the manuscript, F. Alberto for suggestion for *pspA*  
805 cloning, L. Espinosa pour fluorescence microscope assistance, H.M. Yang and T. Jin for  
806 Initiation and continuous support of this study. This work was supported by a funding from the  
807 Excellence Initiative of Aix-Marseille University - A\*Midex, a French “Investissements  
808 d’Avenir” programme, by a grant DBM2021 from CNRS, by grants U1706208, 41330962 from  
809 NSFC and grants from CNRS for LIA-MagMC. The LABGeM (CEA/Genoscope & CNRS  
810 UMR8030), the France Génomique and French Bioinformatics Institute national  
811 infrastructures (funded as part of Investissement d’Avenir program managed by Agence  
812 Nationale pour la Recherche, contracts ANR-10-INBS-09 and ANR-11-INBS-0013) are  
813 acknowledged for support within the MicroScope annotation platform.

### 814 [Author contributions](#)

815 LF.W. designed and LF.W., T.X., W.Z. and J.C. led the project. C.S., XX.Q, LF.W., HM.P.,  
816 YR.C., J.L., YC.Z. and KX.C., collected the samples. W.Z., YR.C., J.L., YC.Z. and KX.C.  
817 prepared DNA for sequencing. W.Z., J.C. and GL.L. conducted genomic analysis. A.K.,  
818 H.L.G., J.D., X.L., N.M. and E.D. performed microscopy analyses. S.Z. carried out CET  
819 analysis. J.D. and X.L. constructed the *pspA* expression strains. LF.W., J.C. and W.Z wrote  
820 the manuscript. C.S., T.X., HM.P., WJ.Z., A.R. revised the paper. W.Z, J.C. and J.D.  
821 contributed equally.

822

### 823 [Competing interests](#)

824 The authors declare no competing interest
